# Supplementary material for: What comes next: the fate of germa-, stanna-, and plumba-closo-dodecaborate based electrolytes in calcium ion batteries
Source: Royal Society of Chemistry journal article supplement (doi:10.1039/d4cp04670f), 2024-12-19
Supplement: d4cp04670f1.pdf [file d4cp04670f1.pdf]

## What Comes Next: The Fate of Germa, Stanna, and Plumba-*closo*-Dodecaborate Based Electrolytes in Calcium Ion Batteries

Mohammad Faizan, and Ravinder Pawar\*

Laboratory of Advanced Computation and Theory for Materials and Chemistry,  
Department of Chemistry, National Institute of Technology Warangal (NITW), Warangal, Telangana-  
506004, India.

[ravinder\\_pawar@nitw.ac.in](mailto:ravinder_pawar@nitw.ac.in)

### Computational Details

The modelled anions were fully optimized using M062X functional employing Def2TZVP basis set for C, Si and Ge. In case of Sn and Pb the Def2TZVP basis sets with effective core potential have been generated from the basis set exchange.<sup>1-3</sup> No symmetrical or geometrical constraints were imposed during the optimization. The harmonic frequency calculations were carried out on the same level of theory to depict the nature of the stationary points as local minima. The optimized geometries were used for further calculations and analysis. The zero-point energies of the optimized were considered. The vertical detachment energy (VDE) has been calculated by taking the difference of the energies of the optimized anion and the corresponding one electron less specie,

$$\text{VDE} = E[XB_{11}H_{11}^{-1}] - E[XB_{11}H_{11}^{-2}] \quad (1)$$

Where,  $E[XB_{11}H_{11}^{-2}]$  is the electronic energy of the optimized  $[XB_{11}H_{11}^{-2}]$  anion and  $E[XB_{11}H_{11}^{-1}]$  is the single energy of same anion with one electron less. Similarly, the VDEs of other considered anions have also been calculated. The cation binding energy has been calculated as follows,

$$\text{Binding energy (BE)} = E_{\text{anion}} + E_{\text{cation}} - E_{\text{ion pair}} \quad (2)$$

Further, the electrochemical stability window (ESW) has been calculated following the frontier molecular orbital approach.<sup>4,5</sup> The cathodic ( $V_{CL}$ ) and anodic ( $V_{AL}$ ) are calculated by the energies of lowest unoccupied orbital (LUMO) and highest occupied molecular orbital (HOMO), respectively. Then the ESW is calculated by taking the difference between  $V_{CL}$  and  $V_{AL}$ .

$$V_{CL} = \frac{-E_{LUMO}}{e}$$

and,

$$V_{AL} = \frac{-E_{HOMO}}{e}$$

The basin analysis of the electron density and molecular electrostatic potential surfaces of the proposed anions were analysed using Multiwfn software.<sup>6</sup> All the geometry optimizations have been carried out using Gaussian 16 program.<sup>7</sup>

## References

- (1) Zhao, Y.; Truhlar, D. G. The M06 Suite of Density Functionals for Main Group Thermochemistry, Thermochemical Kinetics, Noncovalent Interactions, Excited States, and Transition Elements: Two New Functionals and Systematic Testing of Four M06-Class Functionals and 12 Other Functionals. *Theor Chem Account* **2008**, *120* (1), 215–241. <https://doi.org/10.1007/s00214-007-0310-x>.
- (2) Weigend, F.; Ahlrichs, R. Balanced Basis Sets of Split Valence, Triple Zeta Valence and Quadruple Zeta Valence Quality for H to Rn: Design and Assessment of Accuracy. *Phys. Chem. Chem. Phys.* **2005**, *7* (18), 3297–3305. <https://doi.org/10.1039/B508541A>.
- (3) Pritchard, B. P.; Altarawy, D.; Didier, B.; Gibson, T. D.; Windus, T. L. New Basis Set Exchange: An Open, Up-to-Date Resource for the Molecular Sciences Community. *J. Chem. Inf. Model.* **2019**, *59* (11), 4814–4820. <https://doi.org/10.1021/acs.jcim.9b00725>.
- (4) Kazemiabnavi, S.; Zhang, Z.; Thornton, K.; Banerjee, S. Electrochemical Stability Window of Imidazolium-Based Ionic Liquids as Electrolytes for Lithium Batteries. *J. Phys. Chem. B* **2016**, *120* (25), 5691–5702. <https://doi.org/10.1021/acs.jpcc.6b03433>.
- (5) Ong, S. P.; Andreussi, O.; Wu, Y.; Marzari, N.; Ceder, G. Electrochemical Windows of Room-Temperature Ionic Liquids from Molecular Dynamics and Density Functional Theory Calculations. *Chem. Mater.* **2011**, *23* (11), 2979–2986. <https://doi.org/10.1021/cm200679y>.
- (6) Lu, T.; Chen, F. Multiwfn: A Multifunctional Wavefunction Analyzer. *Journal of Computational Chemistry* **2012**, *33* (5), 580–592. <https://doi.org/10.1002/jcc.22885>.
- (7) Frisch, M. J.; Trucks, G. W.; Schlegel, H. B.; Scuseria, G. E.; Robb, M. A.; Cheeseman, J. R.; Scalmani, G.; Barone, V.; Petersson, G. A.; Nakatsuji, H.; Li, X.; Caricato, M.; Marenich, A. V.; Bloino, J.; Janesko, B. G.; Gomperts, R.; Mennucci, B.; Hratchian, H. P.; Ortiz, J. V.; Izmaylov, A. F.; Sonnenberg, J. L.; Williams; Ding, F.; Lipparini, F.; Egidi, F.; Goings, J.; Peng, B.; Petrone, A.; Henderson, T.; Ranasinghe, D.; Zakrzewski, V. G.; Gao, J.; Rega, N.; Zheng, G.; Liang, W.; Hada, M.; Ehara, M.; Toyota, K.; Fukuda, R.; Hasegawa, J.; Ishida, M.; Nakajima, T.; Honda, Y.; Kitao, O.; Nakai, H.; Vreven, T.; Throssell, K.; Montgomery Jr., J. A.; Peralta, J. E.; Ogliaro, F.; Bearpark, M. J.; Heyd, J. J.; Brothers, E. N.; Kudin, K. N.; Staroverov, V. N.; Keith, T. A.; Kobayashi, R.; Normand, J.; Raghavachari, K.; Rendell, A. P.; Burant, J. C.; Iyengar, S. S.; Tomasi, J.; Cossi, M.; Millam, J. M.; Klene, M.; Adamo, C.; Cammi, R.; Ochterski, J. W.; Martin, R. L.; Morokuma, K.; Farkas, O.; Foresman, J. B.; Fox, D. J. Gaussian 16 Rev. C.01, 2016.

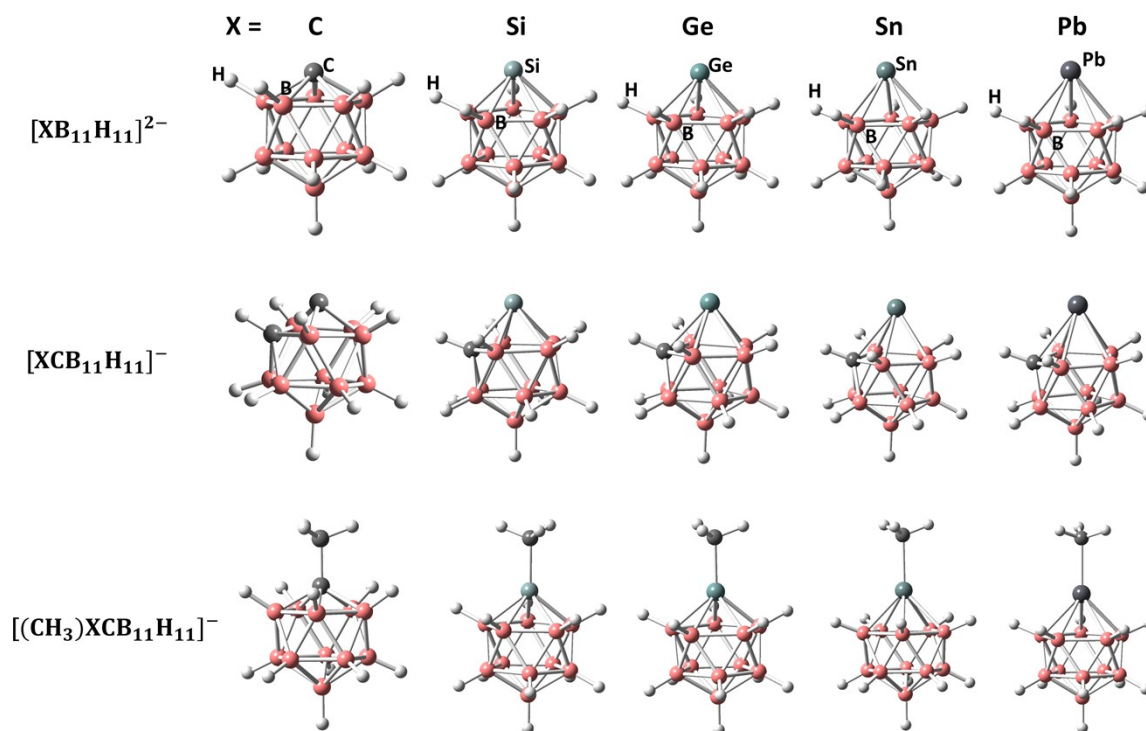

**Figure S1.** Optimized structures of the proposed anions.

**Table S1.** Geometrical parameters of  $XB_{11}H_{11}^{-2}$  anion (where, X=C, Si, Ge, Sn and Pb) (Numbering of the anion cluster has been done as shown in Scheme 2, X is at 1, all the distances are in Å)

|            | C     | Si    | Ge    | Sn    | Pb    |
|------------|-------|-------|-------|-------|-------|
| P1-1       | 0.848 | 1.450 | 1.554 | 1.789 | 1.886 |
| P1-P2      | 1.521 | 1.498 | 1.493 | 1.487 | 1.485 |
| P2-12      | 0.935 | 0.934 | 0.931 | 0.928 | 0.927 |
| 1-12       | 3.304 | 3.883 | 3.978 | 4.204 | 4.298 |
| 1-H(12)    | 4.503 | 5.081 | 5.176 | 5.402 | 5.497 |
| <b>Top</b> |       |       |       |       |       |
| 1-2        | 1.704 | 2.115 | 2.197 | 2.379 | 2.455 |
| 1-3        | 1.704 | 2.115 | 2.197 | 2.380 | 2.456 |
| 1-4        | 1.704 | 2.115 | 2.197 | 2.380 | 2.456 |
| 1-5        | 1.704 | 2.115 | 2.197 | 2.379 | 2.456 |
| 1-6        | 1.704 | 2.115 | 2.197 | 2.380 | 2.455 |
| <b>UR</b>  |       |       |       |       |       |
| 2-3        | 1.738 | 1.810 | 1.826 | 1.844 | 1.848 |
| 3-4        | 1.737 | 1.810 | 1.826 | 1.844 | 1.848 |
| 4-5        | 1.737 | 1.810 | 1.826 | 1.844 | 1.848 |
| 5-6        | 1.737 | 1.810 | 1.826 | 1.844 | 1.848 |
| 6-2        | 1.738 | 1.810 | 1.826 | 1.844 | 1.848 |
| 2-H        | 1.199 | 1.199 | 1.199 | 1.201 | 1.202 |
| 3-H        | 1.199 | 1.199 | 1.199 | 1.201 | 1.202 |
| 4-H        | 1.199 | 1.199 | 1.199 | 1.201 | 1.202 |
| 5-H        | 1.199 | 1.199 | 1.199 | 1.201 | 1.202 |

|               |       |       |       |       |       |
|---------------|-------|-------|-------|-------|-------|
| 6-H           | 1.199 | 1.199 | 1.199 | 1.201 | 1.202 |
| <b>Middle</b> |       |       |       |       |       |
| 2-7           | 1.779 | 1.770 | 1.768 | 1.766 | 1.765 |
| 2-8           | 1.779 | 1.770 | 1.768 | 1.766 | 1.765 |
| 3-8           | 1.779 | 1.770 | 1.768 | 1.766 | 1.765 |
| 3-9           | 1.779 | 1.770 | 1.768 | 1.766 | 1.765 |
| 4-9           | 1.780 | 1.769 | 1.768 | 1.766 | 1.765 |
| 4-10          | 1.779 | 1.770 | 1.768 | 1.766 | 1.765 |
| 5-10          | 1.780 | 1.769 | 1.768 | 1.766 | 1.765 |
| 5-11          | 1.780 | 1.770 | 1.768 | 1.766 | 1.765 |
| 5-11          | 1.779 | 1.770 | 1.768 | 1.766 | 1.765 |
| 5-7           | 1.780 | 1.770 | 1.768 | 1.766 | 1.765 |
| <b>LR</b>     |       |       |       |       |       |
| 7-8           | 1.772 | 1.773 | 1.774 | 1.776 | 1.777 |
| 8-9           | 1.772 | 1.773 | 1.774 | 1.776 | 1.777 |
| 9-10          | 1.772 | 1.773 | 1.774 | 1.776 | 1.777 |
| 10-11         | 1.772 | 1.773 | 1.774 | 1.776 | 1.777 |
| 11-7          | 1.772 | 1.773 | 1.775 | 1.776 | 1.777 |
| 7-H           | 1.199 | 1.198 | 1.198 | 1.198 | 1.199 |
| 8-H           | 1.199 | 1.198 | 1.198 | 1.198 | 1.199 |
| 9-H           | 1.199 | 1.198 | 1.198 | 1.198 | 1.199 |
| 10-H          | 1.199 | 1.198 | 1.198 | 1.198 | 1.199 |
| 11-H          | 1.199 | 1.198 | 1.198 | 1.198 | 1.199 |
| <b>Bottom</b> |       |       |       |       |       |
| 7-12          | 1.774 | 1.774 | 1.773 | 1.773 | 1.774 |
| 8-12          | 1.774 | 1.774 | 1.773 | 1.773 | 1.773 |
| 9-12          | 1.774 | 1.774 | 1.773 | 1.773 | 1.774 |
| 10-12         | 1.774 | 1.774 | 1.774 | 1.773 | 1.773 |
| 11-12         | 1.774 | 1.774 | 1.773 | 1.773 | 1.773 |
| 12-H          | 1.200 | 1.198 | 1.198 | 1.198 | 1.198 |

**Table S2. Geometrical parameters of  $XCB_{10}H_{11}^{-1}$  anion (where, X=C, Si, Ge, Sn and Pb) (Numbering of the anion cluster has been done as shown in Scheme 1, all the distances are in Å, 1 = X, 2 = C, and H(12) represents the H atom at 12<sup>th</sup> position B atom)**

|            | <b>1 = C</b> | <b>Si</b> | <b>Ge</b> | <b>Sn</b> | <b>Pb</b> |
|------------|--------------|-----------|-----------|-----------|-----------|
| P1-1       | 0.874        | 1.482     | 1.600     | 1.851     | 1.960     |
| P1-P2      | 1.504        | 1.485     | 1.481     | 1.477     | 1.476     |
| P2-12      | 0.936        | 0.934     | 0.933     | 0.932     | 0.931     |
| 1-12       | 3.314        | 3.901     | 4.013     | 4.259     | 4.365     |
| 1-H(12)    | 4.502        | 5.089     | 5.201     | 5.447     | 5.553     |
| <b>Top</b> |              |           |           |           |           |
| 1-2        | 1.651        | 2.096     | 2.219     | 2.442     | 2.556     |
| 1-3        | 1.703        | 2.113     | 2.203     | 2.397     | 2.484     |
| 1-4        | 1.709        | 2.103     | 2.182     | 2.358     | 2.427     |
| 1-5        | 1.709        | 2.103     | 2.182     | 2.357     | 2.427     |
| 1-6        | 1.703        | 2.113     | 2.203     | 2.397     | 2.483     |
| <b>UR</b>  |              |           |           |           |           |
| 2-3        | 1.664        | 1.704     | 1.709     | 1.709     | 1.704     |

|               |       |       |       |       |       |
|---------------|-------|-------|-------|-------|-------|
| 3-4           | 1.740 | 1.793 | 1.811 | 1.820 | 1.824 |
| 4-5           | 1.736 | 1.803 | 1.818 | 1.836 | 1.840 |
| 5-6           | 1.740 | 1.793 | 1.811 | 1.820 | 1.825 |
| 6-2           | 1.664 | 1.704 | 1.709 | 1.709 | 1.704 |
| 2-H           | 1.079 | 1.081 | 1.081 | 1.082 | 1.083 |
| 3-H           | 1.186 | 1.188 | 1.188 | 1.191 | 1.192 |
| 4-H           | 1.187 | 1.191 | 1.191 | 1.193 | 1.194 |
| 5-H           | 1.187 | 1.191 | 1.191 | 1.193 | 1.194 |
| 6-H           | 1.186 | 1.188 | 1.188 | 1.191 | 1.192 |
| <b>Middle</b> |       |       |       |       |       |
| 2-7           | 1.685 | 1.691 | 1.684 | 1.684 | 1.681 |
| 2-8           | 1.685 | 1.691 | 1.684 | 1.683 | 1.681 |
| 3-8           | 1.790 | 1.764 | 1.765 | 1.763 | 1.764 |
| 3-9           | 1.783 | 1.764 | 1.763 | 1.761 | 1.762 |
| 4-9           | 1.772 | 1.769 | 1.767 | 1.765 | 1.764 |
| 4-10          | 1.775 | 1.769 | 1.767 | 1.764 | 1.763 |
| 5-10          | 1.775 | 1.769 | 1.767 | 1.765 | 1.764 |
| 5-11          | 1.772 | 1.769 | 1.767 | 1.765 | 1.764 |
| 5-11          | 1.783 | 1.764 | 1.764 | 1.761 | 1.762 |
| 5-7           | 1.790 | 1.764 | 1.765 | 1.763 | 1.764 |
| <b>LR</b>     |       |       |       |       |       |
| 7-8           | 1.766 | 1.765 | 1.763 | 1.765 | 1.765 |
| 8-9           | 1.759 | 1.765 | 1.766 | 1.768 | 1.768 |
| 9-10          | 1.773 | 1.773 | 1.775 | 1.778 | 1.780 |
| 10-11         | 1.773 | 1.773 | 1.775 | 1.778 | 1.780 |
| 11-7          | 1.759 | 1.765 | 1.766 | 1.768 | 1.768 |
| 7-H           | 1.186 | 1.186 | 1.186 | 1.187 | 1.187 |
| 8-H           | 1.186 | 1.186 | 1.186 | 1.187 | 1.187 |
| 9-H           | 1.188 | 1.188 | 1.188 | 1.189 | 1.189 |
| 10-H          | 1.189 | 1.189 | 1.189 | 1.189 | 1.190 |
| 11-H          | 1.188 | 1.188 | 1.188 | 1.189 | 1.189 |
| <b>Bottom</b> |       |       |       |       |       |
| 7-12          | 1.763 | 1.767 | 1.767 | 1.768 | 1.769 |
| 8-12          | 1.763 | 1.767 | 1.767 | 1.768 | 1.769 |
| 9-12          | 1.779 | 1.775 | 1.775 | 1.776 | 1.777 |
| 10-12         | 1.767 | 1.770 | 1.768 | 1.769 | 1.768 |
| 11-12         | 1.779 | 1.775 | 1.776 | 1.776 | 1.777 |
| 12-H          | 1.189 | 1.188 | 1.188 | 1.188 | 1.188 |

**Table S3. Geometrical parameters of  $CH_3XB_{11}H_{11}^{-1}$  (where, X=C, Si, Ge, Sn and Pb) anion (Numbering of the anion cluster has been done as shown in Scheme 1, all the distances are in Å, 1 = X and H(12) represents the H atom at 12<sup>th</sup> position B atom)**

|       | <b>1 = C</b> | <b>Si</b> | <b>Ge</b> | <b>Sn</b> | <b>Pb</b> |
|-------|--------------|-----------|-----------|-----------|-----------|
| P1-1  | 0.803        | 1.250     | 1.349     | 1.594     | 1.667     |
| P1-P2 | 1.499        | 1.483     | 1.475     | 1.466     | 1.458     |
| P2-12 | 0.929        | 0.919     | 0.918     | 0.915     | 0.915     |
| 1-12  | 3.231        | 3.652     | 3.742     | 3.975     | 4.040     |

|               |       |       |       |       |       |
|---------------|-------|-------|-------|-------|-------|
| 1-H(12)       | 5.938 | 6.702 | 6.877 | 7.294 | 7.409 |
| <b>Top</b>    |       |       |       |       |       |
| 1-2           | 1.701 | 2.013 | 2.093 | 2.274 | 2.333 |
| 1-3           | 1.699 | 2.013 | 2.093 | 2.274 | 2.333 |
| 1-4           | 1.703 | 2.013 | 2.093 | 2.274 | 2.334 |
| 1-5           | 1.699 | 2.013 | 2.093 | 2.274 | 2.334 |
| 1-6           | 1.702 | 2.014 | 2.093 | 2.274 | 2.333 |
| 1-C           | 1.518 | 1.862 | 1.947 | 2.130 | 2.180 |
| <b>UR</b>     |       |       |       |       |       |
| 2-3           | 1.763 | 1.856 | 1.881 | 1.907 | 1.922 |
| 3-4           | 1.762 | 1.855 | 1.881 | 1.906 | 1.920 |
| 4-5           | 1.762 | 1.856 | 1.881 | 1.906 | 1.919 |
| 5-6           | 1.763 | 1.855 | 1.881 | 1.906 | 1.919 |
| 6-2           | 1.761 | 1.855 | 1.881 | 1.907 | 1.922 |
| 2-H           | 1.187 | 1.191 | 1.190 | 1.191 | 1.189 |
| 3-H           | 1.187 | 1.191 | 1.190 | 1.191 | 1.189 |
| 4-H           | 1.187 | 1.191 | 1.190 | 1.191 | 1.189 |
| 5-H           | 1.187 | 1.191 | 1.190 | 1.191 | 1.190 |
| 6-H           | 1.187 | 1.191 | 1.190 | 1.191 | 1.189 |
| <b>Middle</b> |       |       |       |       |       |
| 2-7           | 1.763 | 1.766 | 1.762 | 1.760 | 1.757 |
| 2-8           | 1.764 | 1.766 | 1.762 | 1.760 | 1.757 |
| 3-8           | 1.765 | 1.765 | 1.763 | 1.760 | 1.756 |
| 3-9           | 1.765 | 1.766 | 1.763 | 1.760 | 1.757 |
| 4-9           | 1.761 | 1.765 | 1.762 | 1.760 | 1.757 |
| 4-10          | 1.761 | 1.765 | 1.762 | 1.760 | 1.757 |
| 5-10          | 1.765 | 1.766 | 1.763 | 1.760 | 1.757 |
| 5-11          | 1.765 | 1.766 | 1.763 | 1.760 | 1.757 |
| 5-11          | 1.763 | 1.765 | 1.763 | 1.760 | 1.756 |
| 5-7           | 1.763 | 1.765 | 1.763 | 1.760 | 1.757 |
| <b>LR</b>     |       |       |       |       |       |
| 7-8           | 1.775 | 1.779 | 1.779 | 1.780 | 1.779 |
| 8-9           | 1.774 | 1.779 | 1.779 | 1.780 | 1.779 |
| 9-10          | 1.775 | 1.778 | 1.779 | 1.780 | 1.779 |
| 10-11         | 1.774 | 1.779 | 1.779 | 1.780 | 1.779 |
| 11-7          | 1.775 | 1.779 | 1.779 | 1.780 | 1.779 |
| 7-H           | 1.188 | 1.189 | 1.189 | 1.189 | 1.189 |
| 8-H           | 1.188 | 1.189 | 1.189 | 1.189 | 1.189 |
| 9-H           | 1.188 | 1.189 | 1.189 | 1.189 | 1.189 |
| 10-H          | 1.188 | 1.189 | 1.189 | 1.189 | 1.189 |
| 11-H          | 1.188 | 1.189 | 1.189 | 1.189 | 1.189 |
| <b>Bottom</b> |       |       |       |       |       |
| 7-12          | 1.773 | 1.770 | 1.770 | 1.769 | 1.768 |
| 8-12          | 1.773 | 1.770 | 1.770 | 1.769 | 1.768 |
| 9-12          | 1.773 | 1.770 | 1.770 | 1.769 | 1.768 |
| 10-12         | 1.773 | 1.770 | 1.770 | 1.769 | 1.769 |
| 11-12         | 1.773 | 1.770 | 1.770 | 1.769 | 1.768 |
| 12-H          | 1.189 | 1.188 | 1.188 | 1.189 | 1.189 |

**Table S4. Vertical Detachment Energy (VDE) and Electrochemical Stability Window of the Considered Anions.**

|                  | <b>X</b>                | <b>C</b> | <b>Si</b> | <b>Ge</b> | <b>Sn</b> | <b>Pb</b> |
|------------------|-------------------------|----------|-----------|-----------|-----------|-----------|
| <b>VDE (eV)</b>  | $XB_{11}H_{11}^{2-}$    | -1.37    | 0.06      | 0.23      | 0.46      | 1.00      |
|                  | $XCB_{10}H_{11}^{-}$    | 3.60     | 4.67      | 4.81      | 4.79      | 5.98      |
|                  | $CH_3XB_{11}H_{11}^{-}$ | 5.95     | 5.82      | 5.65      | 5.11      | 4.79      |
| <b>ESW (V)</b>   | $XB_{11}H_{11}^{2-}$    | 5.83     | 7.03      | 7.36      | 7.02      | 6.50      |
|                  | $XCB_{10}H_{11}^{-}$    | 7.05     | 7.86      | 8.03      | 7.07      | 6.47      |
|                  | $CH_3XB_{11}H_{11}^{-}$ | 9.48     | 9.01      | 8.68      | 7.16      | 6.61      |
| <b>HOMO (eV)</b> | $XB_{11}H_{11}^{2-}$    | 1.88     | 0.67      | 0.38      | 0.08      | 0.44      |
|                  | $XCB_{10}H_{11}^{-}$    | -2.99    | -3.88     | -4.13     | -4.08     | -3.69     |
|                  | $CH_3XB_{11}H_{11}^{-}$ | -5.23    | -5.03     | -4.89     | -4.36     | -4.07     |

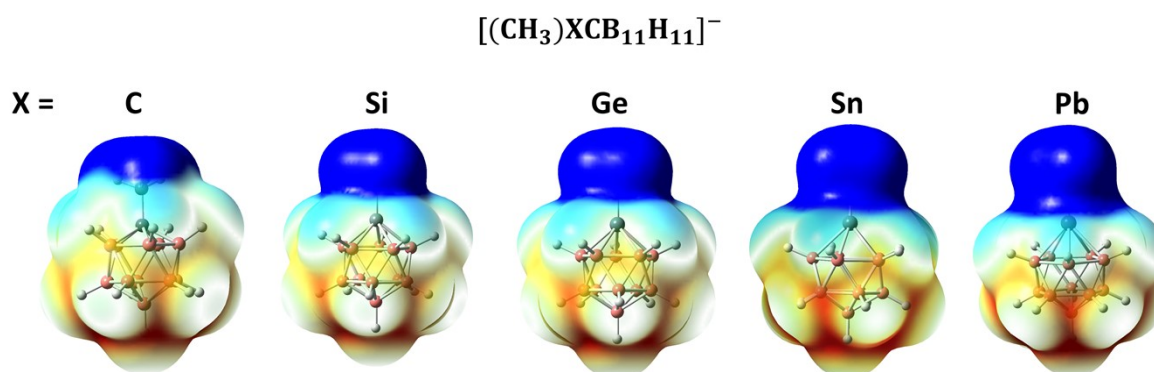

**Figure S2.** MESP surfaces of the -CH<sub>3</sub> substituted anion. (surface is plotted at 0.002 a.u. isovalue)

**Table S5. The Ca<sup>2+</sup> binding energies (BE) and V<sub>min</sub> of the unique sites of the proposed anions observed from the MESP analysis.**

| $XB_{11}H_{11}^{2-}$ | <b>BE (eV)</b>                    |           |           |           |           |
|----------------------|-----------------------------------|-----------|-----------|-----------|-----------|
| <b>Binding sites</b> | <b>C</b>                          | <b>Si</b> | <b>Ge</b> | <b>Sn</b> | <b>Pb</b> |
| <b>S1</b>            | -18.33                            | -18.30    | -18.37    | -18.52    | -18.75    |
| <b>S2</b>            | -18.34                            | -18.21    | -18.27    | -18.40    | -18.63    |
| <b>S3</b>            | -18.13                            | -18.15    | -18.21    | -18.36    | -18.60    |
| <b>S4</b>            | -19.69                            | -18.39    | -         | -         | -         |
|                      | <b>V<sub>min</sub> (kcal/mol)</b> |           |           |           |           |
| <b>S1</b>            | -178.54                           | -176.82   | -177.15   | -177.78   | -178.77   |
| <b>S2</b>            | -177.50                           | -176.46   | -176.88   | -177.88   | -179.14   |
| <b>S3</b>            | -177.14                           | -175.69   | -176.18   | -176.42   | -178.56   |
| <b>S4</b>            | -194.95                           | -174.52   | -         | -         | -         |
| $XCB_{10}H_{11}^{-}$ | <b>BE (eV)</b>                    |           |           |           |           |
| <b>Binding sites</b> | <b>C</b>                          | <b>Si</b> | <b>Ge</b> | <b>Sn</b> | <b>Pb</b> |

|                                                                 |                                  |           |           |           |           |
|-----------------------------------------------------------------|----------------------------------|-----------|-----------|-----------|-----------|
| <b>S1</b>                                                       | -10.52                           | -10.77    | -10.89    | -11.22    | -11.49    |
| <b>S2</b>                                                       | -11.03                           | -11.25    | -11.33    | -11.58    | -11.83    |
| <b>S3</b>                                                       | -11.00                           | -11.26    | -11.36    | -11.66    | -11.93    |
| <b>S4</b>                                                       | -10.94                           | -11.23    | -11.35    | -11.67    | -11.95    |
| <b>S5</b>                                                       | -10.39                           | -10.70    | -11.05    | -11.17    | -11.45    |
| <b>S6</b>                                                       | -12.01                           | -10.81    | -10.73    | -9.85     | -         |
|                                                                 | <b>V<sub>min</sub>(kcal/mol)</b> |           |           |           |           |
| <b>S1</b>                                                       | -89.32                           | -91.63    | -92.79    | -95.32    | -98.18    |
| <b>S2</b>                                                       | -95.55                           | -96.4     | -96.79    | -98.24    | -100.47   |
| <b>S3</b>                                                       | -94.67                           | -97.04    | -97.91    | -100.15   | -102.78   |
| <b>S4</b>                                                       | -94.99                           | -96.6     | -97.67    | -100.12   | -102.88   |
| <b>S5</b>                                                       | -88.83                           | -90.63    | -91.66    | -94.37    | -97.18    |
| <b>S6</b>                                                       | -113.92                          | -82.84    | -77.85    | -69.1     | -         |
| <i>CH<sub>3</sub>XB<sub>11</sub>H<sub>11</sub><sup>2-</sup></i> | <b>C</b>                         | <b>Si</b> | <b>Ge</b> | <b>Sn</b> | <b>Pb</b> |
| <b>BE (eV)</b>                                                  | -11.31                           | -11.63    | -11.69    | -11.93    | -12.01    |
| <b>V (kcal/mol)</b>                                             | -98.65                           | -100.74   | -101.25   | -102.76   | -102.98   |

**Table S6. Orbital composition analysis of the HOMO of the investigated anions.**

|                                                                |          |           |           |           |           |
|----------------------------------------------------------------|----------|-----------|-----------|-----------|-----------|
| <i>XB<sub>11</sub>H<sub>11</sub><sup>2-</sup></i>              | <b>C</b> | <b>Si</b> | <b>Ge</b> | <b>Sn</b> | <b>Pb</b> |
| <b>Contribution from X</b>                                     | 75.04%   | 74.58%    | 67.79%    | 17.35%    | 19.37%    |
| <b>Contribution from cage</b>                                  | 24.96%   | 25.42%    | 32.21%    | 82.65     | 80.63%    |
| <b>ODI</b>                                                     | 56.74    | 56.06     | 46.70     | 13.43     | 13.84     |
| <i>XCB<sub>10</sub>H<sub>11</sub><sup>-</sup></i>              |          |           |           |           |           |
| <b>Contribution from X</b>                                     | 73.09%   | 68.07%    | 57.22%    | 14.81%    | 16.75%    |
| <b>Contribution from cage</b>                                  | 26.91%   | 31.93%    | 42.78%    | 85.19%    | 83.25%    |
| <b>ODI</b>                                                     | 53.92    | 47.34     | 35.02     | 12.71     | 13.02     |
| <i>CH<sub>3</sub>XB<sub>11</sub>H<sub>11</sub><sup>-</sup></i> |          |           |           |           |           |
| <b>Contribution from X</b>                                     | 0        | 13.71%    | 15.07%    | 19.99%    | 22.36%    |
| <b>Contribution from cage</b>                                  | 100%     | 86.29%    | 84.93%    | 80.01%    | 77.64%    |
| <b>ODI</b>                                                     | 11.86    | 11.96     | 12.40     | 12.57     | 13.27     |

### Cartesian coordinated of the optimized anions

*XB<sub>11</sub>H<sub>11</sub><sup>2-</sup>*  
C

|   |             |             |             |
|---|-------------|-------------|-------------|
| C | 0.00187000  | 0.00125300  | -1.62820200 |
| B | -0.00197400 | -0.00129000 | 1.67566400  |
| B | 1.26139500  | 0.82347700  | 0.74325700  |
| B | -0.53760900 | -1.40926300 | 0.73940100  |
| B | -0.39467000 | 1.45463800  | 0.74181000  |
| B | 0.52723900  | 1.38162000  | -0.77871900 |
| B | -1.50653700 | 0.07456500  | 0.73956800  |
| B | -1.23666000 | -0.80738400 | -0.78221200 |
| B | 1.47706600  | -0.07303100 | -0.77864500 |
| B | 1.17296100  | -0.94640100 | 0.74170900  |
| B | -1.14994500 | 0.92794900  | -0.78089100 |
| H | 2.16639400  | 1.41437000  | 1.26232100  |



|   |             |             |             |
|---|-------------|-------------|-------------|
| H | -0.92323200 | -2.42040400 | 1.25561300  |
| H | -0.67778800 | 2.49828300  | 1.25972500  |
| H | 0.90187800  | 2.36339800  | -1.35704700 |
| H | -2.58738100 | 0.12800400  | 1.25582300  |
| H | -2.11525500 | -1.38109300 | -1.36327700 |
| H | 2.52655800  | -0.12483000 | -1.35707300 |
| H | 2.01458600  | -1.62544800 | 1.25952100  |
| H | -1.96695700 | 1.58718100  | -1.36105400 |
| H | -0.00336900 | -0.00230600 | 2.87518200  |
| B | 0.38700100  | -1.42599100 | -0.78084000 |
| H | 0.66201500  | -2.43911800 | -1.36103400 |

### Si

|    |             |             |             |
|----|-------------|-------------|-------------|
| B  | 1.92216700  | -0.00011400 | 0.00002600  |
| B  | 0.98781300  | -1.50681800 | 0.06851700  |
| B  | 0.98791500  | 1.25919000  | 0.83023100  |
| B  | 0.98783800  | -0.53082600 | -1.41180000 |
| B  | -0.50994500 | -1.28546100 | -0.84752900 |
| B  | 0.98802600  | 1.17868400  | -0.94102400 |
| B  | -0.50970800 | 1.53818100  | -0.07000900 |
| B  | -0.51001600 | -1.20340800 | 0.96067400  |
| B  | 0.98786600  | -0.40045900 | 1.45415800  |
| B  | -0.50975300 | 0.40887000  | -1.48442900 |
| H  | 1.52677400  | -2.57581300 | 0.11715900  |
| H  | 1.52697500  | 2.15259700  | 1.41919300  |
| H  | 1.52680100  | -0.90752100 | -2.41342400 |
| H  | -0.97453100 | -2.20866700 | -1.45625700 |
| H  | 1.52709100  | 2.01488900  | -1.60872000 |
| H  | -0.97416700 | 2.64291200  | -0.12028200 |
| H  | -0.97454100 | -2.06755800 | 1.65072000  |
| H  | 1.52689900  | -0.68451200 | 2.48584200  |
| H  | -0.97426700 | 0.70236600  | -2.55062300 |
| H  | 3.12024300  | -0.00018500 | 0.00002600  |
| B  | -0.50987800 | 0.54190900  | 1.44128500  |
| H  | -0.97430900 | 0.93120200  | 2.47638700  |
| Si | -1.96032800 | 0.00011100  | -0.00003700 |

### Ge

|   |             |             |             |
|---|-------------|-------------|-------------|
| B | 0.11544800  | -1.23987600 | -0.93523300 |
| H | 0.56181500  | -2.12848500 | -1.60562600 |
| B | 0.11562100  | -1.27246700 | 0.89043900  |
| H | 0.56228500  | -2.18431700 | 1.52865200  |
| B | 0.11521500  | 0.45384800  | 1.48527400  |
| H | 0.56046100  | 0.77933200  | 2.55021600  |
| B | 0.11516300  | 1.55315800  | 0.02776400  |
| H | 0.56051400  | 2.66648100  | 0.04794900  |
| B | -1.37797500 | 1.23655400  | -0.86500500 |
| H | -1.92218700 | 2.11107300  | -1.47729300 |

|    |             |             |             |
|----|-------------|-------------|-------------|
| B  | -1.37762200 | -0.44078300 | -1.44355700 |
| H  | -1.92126400 | -0.75213400 | -2.46498900 |
| B  | -1.37750800 | -1.50946800 | -0.02693400 |
| H  | -1.92066900 | -2.57736700 | -0.04635600 |
| B  | -1.37766200 | -0.49210500 | 1.42694700  |
| H  | -1.92123700 | -0.83987800 | 2.43660700  |
| B  | -1.37814700 | 1.20471100  | 0.90858200  |
| H  | -1.92243700 | 2.05683200  | 1.55159600  |
| B  | -2.30885700 | -0.00063500 | -0.00005000 |
| H  | -3.50710000 | 0.00004400  | -0.00016100 |
| B  | 0.11547100  | 0.50657900  | -1.46832800 |
| H  | 0.56094600  | 0.86930400  | -2.52103400 |
| Ge | 1.66916000  | 0.00004800  | 0.00002900  |

### Sn

|    |             |             |             |
|----|-------------|-------------|-------------|
| B  | 0.24568000  | -1.56844600 | -0.02846700 |
| H  | -0.16832800 | -2.69519600 | -0.04885500 |
| B  | 0.24561700  | -0.45758000 | -1.50046700 |
| H  | -0.16864900 | -0.78605300 | -2.57834800 |
| B  | 0.24550200  | 1.28570600  | -0.89865000 |
| H  | -0.16810600 | 2.20928900  | -1.54460300 |
| B  | 0.24556200  | 1.25236500  | 0.94499300  |
| H  | -0.16837500 | 2.15193600  | 1.62375000  |
| B  | 1.73234200  | 0.44071700  | 1.44509000  |
| H  | 2.28303400  | 0.75085200  | 2.46320700  |
| B  | 1.73223300  | -1.23828300 | 0.86567400  |
| H  | 2.28273800  | -2.11054700 | 1.47569500  |
| B  | 1.73231600  | -1.20614900 | -0.91025600 |
| H  | 2.28281200  | -2.05578200 | -1.55140600 |
| B  | 1.73220100  | 0.49305500  | -1.42817700 |
| H  | 2.28265400  | 0.84073000  | -2.43423900 |
| B  | 1.73221000  | 1.51073700  | 0.02762600  |
| H  | 2.28279600  | 2.57491300  | 0.04684800  |
| B  | 2.66046000  | -0.00011500 | -0.00017200 |
| H  | 3.85839800  | 0.00003700  | -0.00006000 |
| Sn | -1.54358600 | -0.00002000 | 0.00000000  |
| B  | 0.24552700  | -0.51185300 | 1.48278600  |
| H  | -0.16792900 | -0.87996500 | 2.54808600  |

### Pb

|   |             |             |             |
|---|-------------|-------------|-------------|
| H | -2.67158800 | 1.17110900  | -2.29364200 |
| H | -2.67194000 | -1.81949600 | -1.82248800 |
| H | -2.67159400 | -2.29558500 | 1.16755400  |
| H | -2.67189100 | 0.40098400  | 2.54383200  |
| B | -2.11787200 | 0.68750300  | -1.34642200 |
| B | -2.11819400 | 1.49288500  | 0.23748300  |
| B | -2.11807300 | 0.23529800  | 1.49335000  |
| B | -2.11792200 | -1.34765600 | 0.68534500  |
| B | -2.11808100 | -1.06814800 | -1.06991700 |
| H | -2.67204100 | 2.54312600  | 0.40450800  |

|    |             |             |             |
|----|-------------|-------------|-------------|
| H  | -0.22629000 | 2.40897700  | -1.22491000 |
| H  | -0.22639600 | -0.42063000 | -2.66973700 |
| H  | -0.22631300 | -2.66918200 | -0.42505200 |
| H  | -0.22614600 | -1.22851100 | 2.40739200  |
| B  | -0.63355300 | 1.11085100  | 1.11226300  |
| B  | -0.63329400 | 1.40127300  | -0.71229400 |
| B  | -0.63329800 | -0.24471400 | -1.55286500 |
| B  | -0.63329000 | -1.55261300 | -0.24727500 |
| B  | -0.63324100 | -0.71472700 | 1.40027900  |
| H  | -0.22672500 | 1.90996400  | 1.91219600  |
| B  | -3.04526200 | -0.00015100 | 0.00000800  |
| H  | -4.24368500 | -0.00022500 | 0.00002300  |
| Pb | 1.25298800  | 0.00000600  | 0.00000700  |

$XCB_{10}H_{11}^-$

|   |             |             |             |
|---|-------------|-------------|-------------|
| C |             |             |             |
| C | 0.00000100  | -0.19794600 | -1.61777200 |
| B | -0.00000100 | 0.17490900  | 1.67524300  |
| B | -1.43632000 | -0.38787200 | 0.78958600  |
| B | 0.88288400  | 1.27309000  | 0.61485800  |
| B | -0.00000700 | -1.42026700 | 0.91482500  |
| B | -0.86796800 | -1.28710300 | -0.62731500 |
| B | 1.43631500  | -0.38788300 | 0.78959000  |
| B | 1.40496700  | 0.35565800  | -0.83077500 |
| B | -1.40496300 | 0.35567200  | -0.83077700 |
| B | -0.88287500 | 1.27309800  | 0.61485700  |
| B | 0.86795800  | -1.28711100 | -0.62731000 |
| H | -2.46694000 | -0.63862700 | 1.32420300  |
| H | 1.47133500  | 2.25977800  | 0.90760700  |
| H | -0.00001600 | -2.42478300 | 1.55014900  |
| H | -1.48544700 | -2.15882400 | -1.14430300 |
| H | 2.46693300  | -0.63864300 | 1.32420900  |
| H | 2.34476000  | 0.72074000  | -1.45454800 |
| H | -2.34474700 | 0.72076500  | -1.45455600 |
| H | -1.47131500 | 2.25979300  | 0.90760600  |
| H | 1.48542800  | -2.15883800 | -1.14430100 |
| H | 0.00000000  | 0.33369000  | 2.85309400  |
| H | 0.00001000  | 2.11804100  | -1.45755300 |
| C | 0.00000600  | 1.24727000  | -0.81981400 |

**Si**

|   |             |             |             |
|---|-------------|-------------|-------------|
| B | 1.92827000  | -0.08253400 | -0.00000100 |
| B | 1.04605900  | 1.16799800  | 0.88250200  |
| B | 0.97353900  | -0.50696500 | -1.43541800 |
| B | 0.97353900  | -0.50698800 | 1.43541100  |
| B | -0.48449500 | 0.48596800  | 1.43346700  |
| B | 0.93527100  | -1.54750000 | -0.00001200 |
| B | -0.55231600 | -1.22520800 | -0.90126700 |
| B | 1.04605900  | 1.16801200  | -0.88248400 |
| B | -0.55231600 | -1.22522200 | 0.90124800  |

|    |             |             |             |
|----|-------------|-------------|-------------|
| H  | 1.51367800  | 2.08568100  | 1.47021200  |
| H  | 1.48164900  | -0.82918000 | -2.45976500 |
| H  | 1.48165000  | -0.82921700 | 2.45975300  |
| H  | -0.96108700 | 0.97169100  | 2.40745100  |
| H  | 1.42572100  | -2.63037800 | -0.00002200 |
| H  | -1.07373100 | -2.07059500 | -1.55791900 |
| H  | -0.74986500 | 2.41525300  | 0.00001900  |
| H  | 1.51367800  | 2.08570500  | -1.47017900 |
| H  | -1.07373200 | -2.07061900 | 1.55788600  |
| H  | 3.11621600  | -0.10146800 | -0.00000100 |
| B  | -0.48449500 | 0.48599100  | -1.43345900 |
| H  | -0.96108900 | 0.97172700  | -2.40743600 |
| Si | -1.97102000 | 0.03806400  | 0.00000000  |
| C  | -0.37739800 | 1.40012500  | 0.00001100  |

### Ge

|    |             |             |             |
|----|-------------|-------------|-------------|
| C  | 0.03115900  | -1.41566800 | 0.00024700  |
| H  | -0.33261900 | -2.43382900 | 0.00046100  |
| B  | -0.08979400 | -0.49403000 | -1.43443500 |
| H  | -0.54634800 | -0.98292300 | -2.41669300 |
| B  | -0.15803200 | 1.23810600  | -0.90923900 |
| H  | -0.65816400 | 2.08944500  | -1.57522200 |
| B  | -0.15793700 | 1.23848700  | 0.90882500  |
| H  | -0.65798200 | 2.09013800  | 1.57447200  |
| B  | -0.08973100 | -0.49350600 | 1.43459200  |
| H  | -0.54622700 | -0.98201300 | 2.41707000  |
| B  | 1.44484200  | -1.16768900 | 0.88191700  |
| H  | 1.92048800  | -2.07742200 | 1.47605500  |
| B  | 1.44471900  | -1.16804500 | -0.88151400 |
| H  | 1.92042900  | -2.07796000 | -1.47532500 |
| B  | 1.36200100  | 0.50702800  | -1.43589900 |
| H  | 1.87211000  | 0.83041000  | -2.45910500 |
| B  | 1.32451300  | 1.55082700  | -0.00030000 |
| H  | 1.81865200  | 2.63223100  | -0.00063800 |
| B  | 1.36211400  | 0.50755300  | 1.43569000  |
| H  | 1.87223400  | 0.83118700  | 2.45880600  |
| B  | 2.31915400  | 0.08917700  | -0.00007700 |
| H  | 3.50699100  | 0.11536300  | -0.00009700 |
| Ge | -1.69268000 | -0.01813000 | 0.00002900  |

### Sn

|   |             |             |             |
|---|-------------|-------------|-------------|
| C | -0.41388600 | -1.42905600 | 0.00238300  |
| H | -0.08487200 | -2.46019600 | 0.00430200  |
| B | -0.28250300 | -0.50270800 | 1.43295500  |
| H | 0.15238400  | -1.00400000 | 2.42183400  |
| B | -0.19787500 | 1.24038800  | 0.91604400  |
| H | 0.27664200  | 2.10363400  | 1.58980200  |
| B | -0.19726300 | 1.23737900  | -0.91971400 |

|    |             |             |             |
|----|-------------|-------------|-------------|
| H  | 0.27681000  | 2.09872300  | -1.59618400 |
| B  | -0.28185900 | -0.50759400 | -1.43081700 |
| H  | 0.15351300  | -1.01171100 | -2.41806400 |
| B  | -1.82252700 | -1.16400400 | -0.88087400 |
| H  | -2.31802800 | -2.06539200 | -1.47244000 |
| B  | -1.82268900 | -1.16114500 | 0.88401700  |
| H  | -2.31834800 | -2.06064700 | 1.47834600  |
| B  | -1.71994400 | 0.51506400  | 1.43652200  |
| H  | -2.23228300 | 0.84498500  | 2.45696600  |
| B  | -1.67029700 | 1.55838000  | -0.00272700 |
| H  | -2.15696300 | 2.64356900  | -0.00494000 |
| B  | -1.71917800 | 0.51026500  | -1.43824700 |
| H  | -2.23085500 | 0.83720000  | -2.46000600 |
| B  | -2.68089800 | 0.10685400  | -0.00045600 |
| H  | -3.86818900 | 0.14909600  | -0.00084700 |
| Sn | 1.57617300  | -0.01330600 | 0.00006800  |

**Pb**

|    |             |             |             |
|----|-------------|-------------|-------------|
| C  | -0.83278700 | -1.43776500 | 0.00230400  |
| H  | -0.51550300 | -2.47285000 | 0.00416100  |
| B  | -0.68352000 | -0.51343600 | 1.42608000  |
| H  | -0.25778900 | -1.01940600 | 2.41805500  |
| B  | -0.58306500 | 1.23607500  | 0.91827400  |
| H  | -0.11212700 | 2.09924600  | 1.59647900  |
| B  | -0.58272300 | 1.23314200  | -0.92196800 |
| H  | -0.11239500 | 2.09449700  | -1.60287100 |
| B  | -0.68311600 | -0.51823900 | -1.42400100 |
| H  | -0.25684200 | -1.02692500 | -2.41436800 |
| B  | -2.23520000 | -1.15700300 | -0.88087200 |
| H  | -2.74500300 | -2.04957700 | -1.47479300 |
| B  | -2.23519100 | -1.15417500 | 0.88400200  |
| H  | -2.74505300 | -2.04485900 | 1.48074600  |
| B  | -2.10967400 | 0.52067800  | 1.43729700  |
| H  | -2.61946200 | 0.85789300  | 2.45726200  |
| B  | -2.05037700 | 1.56597400  | -0.00262100 |
| H  | -2.52865000 | 2.65553000  | -0.00469200 |
| B  | -2.10916600 | 0.51594000  | -1.43890000 |
| H  | -2.61835700 | 0.85027800  | -2.46013000 |
| B  | -3.07632700 | 0.12623300  | -0.00035400 |
| H  | -4.26327700 | 0.18578400  | -0.00063900 |
| Pb | 1.28674400  | -0.00950000 | 0.00002800  |

**CH<sub>3</sub><sup>XCB<sub>11</sub>H<sub>11</sub></sup>-**

|   |             |             |             |
|---|-------------|-------------|-------------|
| C |             |             |             |
| C | 1.21155400  | -0.00035900 | 0.00001600  |
| B | -2.01975700 | 0.00026800  | -0.00002500 |
| B | -1.09114300 | -1.50933900 | 0.02560900  |
| B | -1.09038200 | 1.20600700  | -0.90825400 |
| B | -1.09040400 | -0.44164700 | 1.44343200  |

|   |             |             |             |
|---|-------------|-------------|-------------|
| B | 0.40711500  | -1.19872100 | 0.90102400  |
| B | -1.09046800 | 1.23624100  | 0.86668800  |
| B | 0.40529800  | 1.49979400  | -0.02548000 |
| B | 0.40697700  | -1.22867500 | -0.86001300 |
| B | -1.09023700 | -0.49042800 | -1.42748200 |
| B | 0.41040300  | 0.48756100  | 1.41672500  |
| H | -1.59366500 | -2.58578200 | 0.04400700  |
| H | -1.59210800 | 2.06575000  | -1.55683200 |
| H | -1.59160700 | -0.75641700 | 2.47361700  |
| H | 1.06973300  | -1.98435100 | 1.49456100  |
| H | -1.59227500 | 2.11757400  | 1.48554300  |
| H | 1.06836300  | 2.48384000  | -0.04230900 |
| H | 1.06952600  | -2.03412900 | -1.42640600 |
| H | -1.59153600 | -0.83989100 | -2.44638200 |
| H | 1.07369900  | 0.80650600  | 2.34808900  |
| H | -3.20837100 | 0.00041400  | -0.00009500 |
| B | 0.41061800  | 0.43912200  | -1.43242100 |
| H | 1.07395100  | 0.72647000  | -2.37400100 |
| C | 2.72952200  | 0.00002400  | 0.00011400  |
| H | 3.10950400  | -0.48554800 | 0.89883200  |
| H | 3.10962100  | -0.53481500 | -0.87012900 |
| H | 3.10860500  | 1.02147700  | -0.02828300 |

Si

|    |             |             |             |
|----|-------------|-------------|-------------|
| B  | 2.24981300  | 0.00005400  | -0.00008200 |
| B  | 1.33082800  | 1.05125200  | -1.08815500 |
| B  | 1.33109700  | -1.49019400 | 0.26224700  |
| B  | 1.33089600  | 1.35984800  | 0.66353000  |
| B  | -0.15201600 | 1.55454900  | -0.27365800 |
| B  | 1.33089800  | -0.21092200 | 1.49800500  |
| B  | -0.15243600 | -1.09683700 | 1.13493300  |
| B  | -0.15314100 | 0.22010400  | -1.56261200 |
| B  | 1.33074900  | -0.70999200 | -1.33594300 |
| B  | -0.15291500 | 0.74071100  | 1.39356100  |
| H  | 1.86049400  | 1.79021000  | -1.85390600 |
| H  | 1.86121600  | -2.53797900 | 0.44686400  |
| H  | 1.86082800  | 2.31581300  | 1.13074600  |
| H  | -0.66635300 | 2.61223500  | -0.46005800 |
| H  | 1.86028800  | -0.35906200 | 2.55193200  |
| H  | -0.66498200 | -1.84300500 | 1.90848500  |
| H  | -0.66381000 | 0.36965400  | -2.62778200 |
| H  | 1.86013700  | -1.20893500 | -2.27603000 |
| H  | -0.66403600 | 1.24468900  | 2.34356400  |
| H  | 3.43812300  | 0.00010400  | -0.00014800 |
| B  | -0.15233300 | -1.41858500 | -0.69190800 |
| H  | -0.66581200 | -2.38377000 | -1.16380500 |
| Si | -1.40240700 | 0.00004100  | 0.00008000  |
| C  | -3.26412800 | -0.00003600 | -0.00005000 |
| H  | -3.63481600 | -0.71525900 | -0.73335300 |

|   |             |             |             |
|---|-------------|-------------|-------------|
| H | -3.63504600 | -0.27758300 | 0.98589100  |
| H | -3.63496100 | 0.99259500  | -0.25280300 |

Ge

|    |             |             |             |
|----|-------------|-------------|-------------|
| B  | -0.13024200 | -1.45573300 | -0.66441900 |
| B  | -0.12900800 | -1.08130600 | 1.17890000  |
| B  | -0.12977700 | 0.78741800  | 1.39266100  |
| B  | -0.13009800 | 1.56821100  | -0.31825000 |
| B  | -0.13051000 | 0.18171000  | -1.59002700 |
| B  | -1.60424000 | -1.48297200 | 0.30147600  |
| B  | -1.60387800 | -0.17204300 | 1.50382600  |
| B  | -1.60448800 | 1.37655300  | 0.62880600  |
| B  | -1.60498000 | 1.02246500  | -1.11459400 |
| B  | -1.60498800 | -0.74487000 | -1.31690200 |
| B  | -2.52245200 | -0.00019500 | 0.00082300  |
| C  | 3.16605500  | -0.00035300 | 0.00105100  |
| H  | -3.71081600 | -0.00038600 | 0.00125300  |
| H  | -2.14210400 | 2.34131600  | 1.06866200  |
| H  | -2.14258300 | 1.73935600  | -1.89582600 |
| H  | -2.14310000 | -1.26632800 | -2.23982300 |
| H  | -2.14130800 | -2.52224500 | 0.51300500  |
| H  | -2.14082300 | -0.29314200 | 2.55754700  |
| H  | 0.35723200  | 2.63185700  | -0.53498600 |
| H  | 0.35672200  | 0.30586000  | -2.66847500 |
| H  | 0.35938500  | -2.44257700 | -1.11442200 |
| H  | 0.35816800  | -1.81526400 | 1.97871800  |
| H  | 0.36056600  | 1.32078700  | 2.33669700  |
| H  | 3.52892800  | 0.35041900  | 0.96481800  |
| H  | 3.53042400  | -1.01009900 | -0.17574900 |
| H  | 3.53218700  | 0.65813100  | -0.78372200 |
| Ge | 1.21919100  | 0.00025800  | -0.00079700 |

Sn

|    |             |             |             |
|----|-------------|-------------|-------------|
| Sn | -1.15943300 | 0.00172100  | 0.00069300  |
| B  | 0.43452800  | -0.94577000 | 1.31699500  |
| B  | 0.43317900  | -1.54448200 | -0.49246700 |
| B  | 0.43445500  | -0.00914200 | -1.62112800 |
| B  | 0.43588800  | 1.53948200  | -0.51012100 |
| B  | 0.43604300  | 0.96076100  | 1.30662200  |
| B  | 1.89928000  | -1.43841600 | 0.47542300  |
| B  | 1.89928200  | -0.89795300 | -1.22013000 |
| B  | 1.90069300  | 0.88166000  | -1.23035700 |
| B  | 1.90156100  | 1.44118100  | 0.45919500  |
| B  | 1.90079600  | 0.00711100  | 1.51355600  |
| B  | 2.81557300  | -0.00192500 | -0.00065400 |
| C  | -3.28979200 | -0.00405600 | -0.00157500 |

|   |             |             |             |
|---|-------------|-------------|-------------|
| H | 4.00421000  | -0.00256700 | -0.00089900 |
| H | 2.44606400  | 1.49796200  | -2.08896000 |
| H | 2.44739900  | 2.44793300  | 0.77999800  |
| H | 2.44628400  | 0.01300400  | 2.57034800  |
| H | 2.44362900  | -2.44234000 | 0.80748100  |
| H | 2.44353800  | -1.52470400 | -2.07186200 |
| H | -0.00183900 | 2.59095000  | -0.85777400 |
| H | -0.00174400 | 1.61736200  | 2.19841200  |
| H | -0.00570600 | -1.59106300 | 2.21593000  |
| H | -0.00636800 | -2.59903800 | -0.82841900 |
| H | -0.00602500 | -0.01526100 | -2.72761500 |
| H | -3.64957100 | -0.17982200 | -1.01258000 |
| H | -3.64977400 | -0.79338300 | 0.65400200  |
| H | -3.65606900 | 0.95673900  | 0.35206600  |

Pb

|    |             |             |             |
|----|-------------|-------------|-------------|
| B  | -0.71735100 | -0.13243300 | 1.62817500  |
| B  | -0.71622600 | 1.50741500  | 0.62926100  |
| B  | -0.71624700 | 1.06523900  | -1.23778100 |
| B  | -0.71740000 | -0.84713900 | -1.39653900 |
| B  | -0.71810100 | -1.59001900 | 0.37597600  |
| B  | -2.17527400 | 0.78851400  | 1.29240000  |
| B  | -2.17519300 | 1.47474700  | -0.34908700 |
| B  | -2.17558500 | 0.12563600  | -1.50892000 |
| B  | -2.17576400 | -1.39435500 | -0.58435900 |
| B  | -2.17572300 | -0.98470800 | 1.14691700  |
| B  | -3.09031300 | 0.00205100  | -0.00046400 |
| C  | 3.12986200  | 0.01051400  | -0.00330700 |
| H  | -4.27892700 | 0.00193200  | -0.00034500 |
| H  | -2.72048800 | 0.21243400  | -2.56249100 |
| H  | -2.72110000 | -2.36937700 | -0.99238100 |
| H  | -2.72087400 | -1.67409300 | 1.94824800  |
| H  | -2.72013700 | 1.33704800  | 2.19613800  |
| H  | -2.71968300 | 2.50382600  | -0.59192400 |
| H  | -0.28373900 | -1.42417600 | -2.34191100 |
| H  | -0.28573800 | -2.66827500 | 0.63052400  |
| H  | -0.28340200 | -0.22298800 | 2.73192300  |
| H  | -0.28195000 | 2.52916600  | 1.05607100  |
| H  | -0.28167300 | 1.78736100  | -2.07721100 |
| H  | 3.46438500  | 0.97647800  | -0.36853800 |
| H  | 3.47414700  | -0.15338800 | 1.01305400  |
| H  | 3.47518300  | -0.78492200 | -0.65630100 |
| Pb | 0.94964300  | -0.00230300 | 0.00069600  |

### Cartesian coordinates of the optimized ion pairs of the considered ions

$XB_{11}H_{11}^{2-}$



C

S1

|    |             |             |             |
|----|-------------|-------------|-------------|
| C  | -0.45964500 | 0.00020600  | -1.54753300 |
| B  | -1.08618100 | -0.00019700 | 1.64338200  |
| B  | 0.53281300  | -0.00024700 | 1.01521000  |
| B  | -2.10490900 | -0.88922200 | 0.50131100  |
| B  | -0.45714700 | 1.45791300  | 0.82278600  |
| B  | 0.50159200  | 0.86725100  | -0.54903200 |
| B  | -2.10477700 | 0.88925900  | 0.50157900  |
| B  | -2.07930900 | 0.00022900  | -1.04327300 |
| B  | 0.50155100  | -0.86730300 | -0.54924000 |
| B  | -0.45734900 | -1.45819100 | 0.82238800  |
| B  | -1.08993500 | 1.42907000  | -0.85169600 |
| H  | 1.52913300  | -0.00050500 | 1.74205000  |
| H  | -3.04709400 | -1.51491900 | 0.85117800  |
| H  | -0.17596200 | 2.45997000  | 1.39314400  |
| H  | 1.51234400  | 1.46338900  | -0.96885600 |
| H  | -3.04687600 | 1.51498900  | 0.85162000  |
| H  | -2.96615700 | 0.00039600  | -1.82649000 |
| H  | 1.51227900  | -1.46336200 | -0.96911300 |
| H  | -0.17637500 | -2.46041100 | 1.39255500  |
| H  | -1.26015900 | 2.40313600  | -1.50332300 |
| H  | -1.25743700 | -0.00036500 | 2.81607900  |
| B  | -1.09010200 | -1.42878300 | -0.85210800 |
| H  | -1.26048200 | -2.40264100 | -1.50400400 |
| Ca | 2.80317100  | 0.00001000  | -0.01480900 |

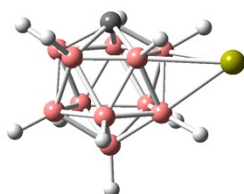

S2

|   |             |             |             |
|---|-------------|-------------|-------------|
| C | 0.96572900  | -0.00067500 | -1.56736600 |
| B | 0.54197600  | 0.00075900  | 1.65894900  |
| B | 1.13045100  | 1.45005900  | 0.79796900  |
| B | 1.13213800  | -1.44869700 | 0.79963600  |
| B | -0.50769100 | 0.89000600  | 0.55638500  |
| B | 0.42931000  | 1.43752400  | -0.84412600 |
| B | -0.50689600 | -0.89121000 | 0.55732900  |
| B | 0.43129000  | -1.43884600 | -0.84247000 |
| B | 2.06008200  | 0.87641700  | -0.61130300 |
| B | 2.15180400  | 0.00139100  | 0.93506000  |
| B | -0.52657500 | -0.00152900 | -1.00873200 |
| H | 1.34873800  | 2.46500100  | 1.36872300  |

|    |             |             |             |
|----|-------------|-------------|-------------|
| H  | 1.35224200  | -2.46270200 | 1.37135200  |
| H  | -1.49414200 | 1.51553800  | 0.94530900  |
| H  | 0.13912900  | 2.40045200  | -1.47514100 |
| H  | -1.49360000 | -1.51671600 | 0.94555100  |
| H  | 0.14219800  | -2.40273600 | -1.47249100 |
| H  | 2.96264000  | 1.47329700  | -1.09000400 |
| H  | 3.13303400  | 0.00231300  | 1.59718500  |
| H  | -1.54760700 | -0.00291600 | -1.73360700 |
| H  | 0.32803700  | 0.00148900  | 2.82520200  |
| B  | 2.06121200  | -0.87544000 | -0.61024800 |
| H  | 2.96434300  | -1.47183900 | -1.08845800 |
| Ca | -2.78074500 | 0.00003500  | 0.01341700  |

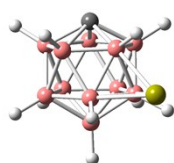

S3

|    |             |             |             |
|----|-------------|-------------|-------------|
| C  | -2.01676000 | 0.00077800  | -1.00390300 |
| B  | 0.50736000  | -0.00089000 | 1.03397200  |
| B  | -0.48005100 | -1.45249600 | 0.82528100  |
| B  | -0.47872900 | 1.45190800  | 0.82617000  |
| B  | 0.52845500  | -0.89308100 | -0.51383200 |
| B  | -1.10716200 | -1.41666800 | -0.85659100 |
| B  | 0.52889500  | 0.89215300  | -0.51337000 |
| B  | -1.10614300 | 1.41740400  | -0.85581500 |
| B  | -2.11690300 | -0.87107400 | 0.45144200  |
| B  | -1.12267300 | -0.00028500 | 1.64465200  |
| B  | -0.48533900 | 0.00036000  | -1.67849200 |
| H  | -0.22453300 | -2.45858100 | 1.39983800  |
| H  | -0.22270700 | 2.45757000  | 1.40123700  |
| H  | 1.51445600  | -1.53136400 | -0.87902400 |
| H  | -1.32244600 | -2.40784700 | -1.46982900 |
| H  | 1.51470700  | 1.53047600  | -0.87906200 |
| H  | -1.32032400 | 2.40917200  | -1.46849800 |
| H  | -3.08492600 | -1.48254800 | 0.75320800  |
| H  | -1.33258400 | -0.00058100 | 2.81057500  |
| H  | -0.23858900 | 0.00061500  | -2.83995900 |
| H  | 1.48626700  | -0.00177300 | 1.78071000  |
| B  | -2.11611700 | 0.87190700  | 0.45198400  |
| H  | -3.08372200 | 1.48395800  | 0.75392400  |
| Ca | 2.78285000  | 0.00000200  | 0.02916500  |

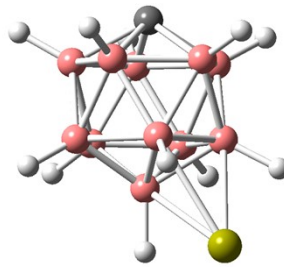

S4

|    |             |             |             |
|----|-------------|-------------|-------------|
| C  | -0.64605100 | 0.00064700  | -0.73090700 |
| B  | 2.23886800  | -0.00060000 | 0.76359300  |
| B  | 1.20839400  | 1.44396800  | 0.76463500  |
| B  | 1.95824000  | -0.88823100 | -0.74975900 |
| B  | 0.74438200  | -0.00064600 | 1.70874600  |
| B  | -0.43505700 | 0.86920700  | 0.73088400  |
| B  | 1.20783200  | -1.44475500 | 0.76353500  |
| B  | 0.28085600  | -1.42932200 | -0.76302900 |
| B  | 0.28148600  | 1.43011000  | -0.76195700 |
| B  | 1.95860900  | 0.88827500  | -0.74908000 |
| B  | -0.43528700 | -0.86922300 | 0.73025000  |
| H  | 1.48810800  | 2.46682200  | 1.29226600  |
| H  | 2.80327100  | -1.51545600 | -1.29212300 |
| H  | 0.68043200  | -0.00108700 | 2.89238100  |
| H  | -1.43254700 | 1.43436600  | 1.16282500  |
| H  | 1.48703900  | -2.46814000 | 1.29040100  |
| H  | -0.15970000 | -2.39279900 | -1.29814700 |
| H  | -0.15861600 | 2.39418200  | -1.29635600 |
| H  | 2.80390300  | 1.51557300  | -1.29094900 |
| H  | -1.43286000 | -1.43455000 | 1.16180200  |
| H  | 3.29644800  | -0.00100700 | 1.29651800  |
| B  | 0.73944800  | 0.00061800  | -1.68688500 |
| H  | 0.63411400  | 0.00108400  | -2.86588500 |
| Ca | -2.74360700 | 0.00000600  | -0.02109700 |

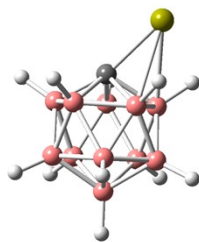

## Si

S1

|    |             |             |             |
|----|-------------|-------------|-------------|
| B  | -0.99941500 | -1.89771200 | 0.00000400  |
| B  | -2.04898300 | -0.77758100 | 0.88866700  |
| B  | 0.60234200  | -1.20684100 | 0.00022800  |
| B  | -2.04878600 | -0.77763600 | -0.88896400 |
| B  | -2.12346300 | 0.74957500  | -0.00019100 |
| B  | -0.39576300 | -1.05176800 | -1.45007900 |
| B  | 0.56384100  | 0.33089000  | -0.90990600 |
| B  | -1.08562100 | 0.58983500  | 1.46901300  |
| B  | -0.39616600 | -1.05166500 | 1.45019100  |
| B  | -1.08530300 | 0.58975200  | -1.46916300 |
| H  | -2.97459700 | -1.16602800 | 1.51693800  |
| H  | 1.61651000  | -1.90351500 | 0.00041500  |
| H  | -2.97428500 | -1.16611000 | -1.51738600 |
| H  | -3.11935900 | 1.39494800  | -0.00029700 |
| H  | -0.09890300 | -1.61995300 | -2.44861700 |
| H  | 1.54890400  | 0.63873200  | -1.58479500 |
| H  | -1.30433600 | 1.10807800  | 2.51407000  |
| H  | -0.09944200 | -1.61974200 | 2.44883300  |
| H  | -1.30367700 | 1.10793000  | -2.51432400 |
| H  | -1.14192700 | -3.07405100 | 0.00000900  |
| B  | 0.56374400  | 0.33088200  | 0.91024900  |
| H  | 1.54886900  | 0.63857900  | 1.58509500  |
| Si | -0.42564000 | 1.99527500  | 0.00000900  |
| Ca | 2.82645400  | -0.07056800 | -0.00001500 |

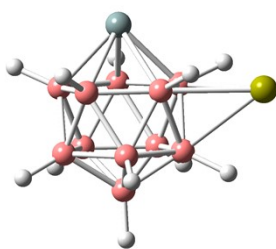

S2

|   |             |             |             |
|---|-------------|-------------|-------------|
| B | 0.09408700  | 1.88492700  | 0.00008500  |
| B | 1.81321000  | 1.47543700  | -0.00093900 |
| B | -0.71924300 | 0.59269800  | 0.89413600  |
| B | 0.83606400  | 1.14253500  | -1.44495000 |
| B | 2.04257100  | -0.02918800 | -0.90469900 |
| B | -0.71993400 | 0.59239600  | -0.89221900 |
| B | -0.51858300 | -0.94087300 | 0.00110600  |
| B | 2.04369400  | -0.02880900 | 0.90310100  |
| B | 0.83771400  | 1.14315200  | 1.44442100  |

|    |             |             |             |
|----|-------------|-------------|-------------|
| B  | 0.43881500  | -0.59698900 | -1.47633900 |
| H  | 2.63679800  | 2.32648800  | -0.00165400 |
| H  | -1.74572600 | 0.82479400  | 1.53360700  |
| H  | 0.92567300  | 1.75177700  | -2.45764100 |
| H  | 3.02603500  | -0.18911000 | -1.54954400 |
| H  | -1.74625200 | 0.82586700  | -1.53153400 |
| H  | -1.44224800 | -1.76227400 | 0.00280600  |
| H  | 3.02790200  | -0.18852900 | 1.54685300  |
| H  | 0.92925000  | 1.75270700  | 2.45674800  |
| H  | 0.21264500  | -1.14618700 | -2.50611700 |
| H  | -0.34319100 | 2.98820400  | -0.00010400 |
| B  | 0.44079800  | -0.59629300 | 1.47676800  |
| H  | 0.21570400  | -1.14535300 | 2.50685800  |
| Si | 1.39172500  | -1.83028600 | -0.00009800 |
| Ca | -2.90633500 | -0.18046800 | -0.00006300 |

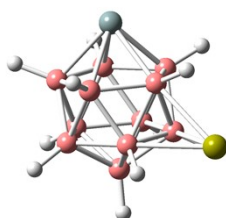

|    |             |             |             |
|----|-------------|-------------|-------------|
| S3 |             |             |             |
| B  | -0.87165100 | 1.05685800  | -0.00001100 |
| B  | 0.13388700  | 0.97803500  | 1.45300400  |
| B  | -0.69277900 | -0.48115900 | -0.89515200 |
| B  | 0.66591900  | 1.87301700  | 0.00033100  |
| B  | 1.80348100  | 0.86200100  | 0.90175600  |
| B  | 0.13421800  | 0.97853300  | -1.45276500 |
| B  | 0.93917300  | -0.61213400 | -1.46596500 |
| B  | 0.93892100  | -0.61263400 | 1.46576800  |
| B  | -0.69286400 | -0.48148200 | 0.89462100  |
| B  | 1.80366300  | 0.86231800  | -0.90123900 |
| H  | -0.21037000 | 1.52104500  | 2.45061000  |
| H  | -1.63431400 | -0.95326700 | -1.53297400 |
| H  | 0.70556800  | 3.05753400  | 0.00052000  |
| H  | 2.64960400  | 1.38326500  | 1.55060100  |
| H  | -0.20988900 | 1.52193400  | -2.45021000 |
| H  | 1.11688900  | -1.14770900 | -2.51102800 |
| H  | 1.11629500  | -1.14863200 | 2.51067400  |
| H  | -1.63428100 | -0.95404400 | 1.53229500  |
| H  | 2.64987300  | 1.38383300  | -1.54976800 |
| H  | -1.93857400 | 1.67163800  | -0.00013000 |
| B  | 0.40084800  | -1.53723100 | -0.00033700 |
| H  | 0.17971000  | -2.70619100 | -0.00051700 |

|    |             |             |             |
|----|-------------|-------------|-------------|
| Si | 2.44959600  | -0.95455200 | -0.00002000 |
| Ca | -2.99494600 | -0.23481400 | 0.00000700  |

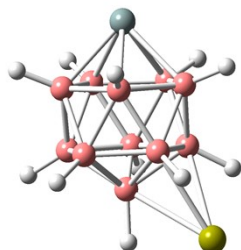

|    |             |             |             |
|----|-------------|-------------|-------------|
| S4 |             |             |             |
| B  | -2.11438000 | -1.22709100 | -0.00000700 |
| B  | -2.22956400 | 0.30336900  | -0.89096400 |
| B  | -1.11469000 | -0.96171700 | 1.43944200  |
| B  | -1.11480700 | -0.96155300 | -1.43950800 |
| B  | -0.63301200 | 0.75226700  | -1.48929600 |
| B  | -0.42367400 | -1.74717600 | -0.00011200 |
| B  | 0.48642400  | -0.52704600 | 0.90465700  |
| B  | -1.35627500 | 1.55617100  | 0.00011700  |
| B  | -2.22949700 | 0.30326500  | 0.89112600  |
| B  | 0.48638800  | -0.52696800 | -0.90488000 |
| H  | -3.19084800 | 0.59697000  | -1.51672900 |
| H  | -1.25067100 | -1.55695800 | 2.45513100  |
| H  | -1.25092300 | -1.55666200 | -2.45525800 |
| H  | -0.46730700 | 1.30805400  | -2.52466200 |
| H  | -0.06398200 | -2.87949900 | -0.00017400 |
| H  | 1.45475800  | -0.89755700 | 1.56695000  |
| H  | -1.70979700 | 2.68837000  | 0.00018700  |
| H  | -3.19074200 | 0.59680000  | 1.51698300  |
| H  | 1.45474900  | -0.89736500 | -1.56718200 |
| H  | -3.00006700 | -2.01300700 | -0.00002900 |
| B  | -0.63290300 | 0.75209900  | 1.48937200  |
| H  | -0.46707300 | 1.30775400  | 2.52479000  |
| Si | 0.67746500  | 1.40399400  | 0.00000900  |
| Ca | 2.82886700  | -0.24654600 | 0.00000700  |

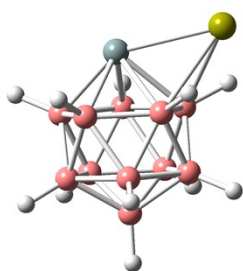

**Ge**

|    |             |             |             |
|----|-------------|-------------|-------------|
| S1 |             |             |             |
| B  | 1.05187300  | -0.09415900 | 1.48233400  |
| H  | 1.35022100  | -0.55570400 | 2.53412800  |
| B  | 2.11170900  | -0.09430400 | 0.00007100  |
| H  | 3.20174500  | -0.56351100 | 0.00010100  |
| B  | 1.05198400  | -0.09418700 | -1.48226600 |
| H  | 1.35045300  | -0.55576800 | -2.53401100 |
| B  | -0.62939800 | -0.09114300 | -0.92042300 |
| H  | -1.56046500 | -0.52770000 | -1.59966300 |
| B  | -0.89355000 | 1.41662400  | -0.00008400 |
| H  | -2.00009200 | 1.95475000  | -0.00012400 |
| B  | 0.11735100  | 1.41804600  | 1.45054700  |
| H  | -0.26222200 | 1.93963000  | 2.44653000  |
| B  | 1.79303700  | 1.39778400  | 0.88955200  |
| H  | 2.64740200  | 1.92777000  | 1.51554700  |
| B  | 1.79310000  | 1.39776200  | -0.88946500 |
| H  | 2.64750000  | 1.92773300  | -1.51542600 |
| B  | 0.11749500  | 1.41800600  | -1.45060100 |
| H  | -0.26203900 | 1.93951400  | -2.44663900 |
| B  | 0.58515400  | 2.34410700  | -0.00001700 |
| H  | 0.54719900  | 3.52839500  | -0.00001800 |
| B  | -0.62942500 | -0.09114800 | 0.92032200  |
| H  | -1.56047000 | -0.52771200 | 1.59959400  |
| Ge | 0.62330900  | -1.69651300 | 0.00000200  |
| Ca | -2.91958800 | -0.04179500 | 0.00000400  |

**S2**

|   |             |             |             |
|---|-------------|-------------|-------------|
| B | -1.68503300 | 0.76293500  | 0.91273100  |
| H | -2.66951000 | 0.89344400  | 1.56266400  |
| B | -0.28247700 | -0.22586600 | 1.48763500  |
| H | -0.20207500 | -0.80386700 | 2.52329900  |
| B | 0.55316100  | -0.81989100 | -0.00131300 |
| H | 1.22785900  | -1.85416200 | -0.00312800 |
| B | -0.28439100 | -0.22431400 | -1.48819500 |
| H | -0.20500800 | -0.80177500 | -2.52424400 |
| B | -0.20214800 | 1.55539100  | -1.44480000 |
| H | -0.12233400 | 2.17110200  | -2.45459900 |

|    |             |             |             |
|----|-------------|-------------|-------------|
| B  | -1.05256300 | 2.13978200  | 0.00109800  |
| H  | -1.60937900 | 3.18524600  | 0.00192400  |
| B  | -0.20064200 | 1.55404700  | 1.44548600  |
| H  | -0.11900700 | 2.16877500  | 2.45574500  |
| B  | 1.14914100  | 0.60322100  | 0.89278100  |
| H  | 2.20165100  | 0.56006000  | 1.53101300  |
| B  | 1.14854200  | 0.60381700  | -0.89481600 |
| H  | 2.20088300  | 0.55923900  | -1.53314400 |
| B  | 0.71286600  | 2.06776800  | 0.00000900  |
| H  | 1.43265600  | 3.01150700  | 0.00026400  |
| B  | -1.68605000 | 0.76376700  | -0.91098600 |
| H  | -2.67122800 | 0.89476300  | -1.55975300 |
| Ge | -1.60846000 | -1.23866500 | 0.00001800  |
| Ca | 3.05771000  | -0.71251600 | 0.00006100  |

S3

|    |             |             |             |
|----|-------------|-------------|-------------|
| B  | -1.27028900 | 1.19768700  | 0.90977000  |
| H  | -2.03312000 | 1.83076900  | 1.56240200  |
| B  | -0.58765100 | -0.38521300 | 1.47810300  |
| H  | -0.81443900 | -0.89182800 | 2.52816000  |
| B  | -0.16344900 | -1.37772700 | -0.00046800 |
| H  | -0.07349400 | -2.56406200 | -0.00037600 |
| B  | -0.58783100 | -0.38440200 | -1.47843300 |
| H  | -0.81525700 | -0.89001300 | -2.52883400 |
| B  | 0.40004600  | 1.09616100  | -1.45366300 |
| H  | 0.81419500  | 1.59481500  | -2.44811000 |
| B  | -0.01755600 | 2.04977100  | 0.00054200  |
| H  | 0.09472700  | 3.22985100  | 0.00068500  |
| B  | 0.40034100  | 1.09533200  | 1.45412200  |
| H  | 0.81472800  | 1.59305900  | 2.44893800  |
| B  | 1.04110900  | -0.45601300 | 0.89544600  |
| H  | 1.92042400  | -1.03693000 | 1.53326600  |
| B  | 1.04108000  | -0.45560200 | -0.89623800 |
| H  | 1.92058500  | -1.03577300 | -1.53439600 |
| B  | 1.40663400  | 1.04913900  | 0.00010500  |
| H  | 2.54061200  | 1.52792000  | -0.00015900 |
| B  | -1.27055300 | 1.19821200  | -0.90896300 |
| H  | -2.03334000 | 1.83172100  | -1.56121800 |
| Ge | -2.23128400 | -0.57637300 | -0.00004600 |
| Ca | 3.35530200  | -0.49411500 | -0.00002400 |

S4

|   |             |             |            |
|---|-------------|-------------|------------|
| B | -1.38092900 | -1.45561600 | 0.00064000 |
| H | -1.67041500 | -2.60521100 | 0.00086200 |
| B | -0.71681800 | -0.58842700 | 1.50514500 |
| H | -0.52536800 | -1.11905800 | 2.54850800 |
| B | 0.30873400  | 0.77994200  | 0.91394000 |
| H | 1.23274700  | 1.24340300  | 1.58246800 |



|    |             |             |             |
|----|-------------|-------------|-------------|
| B  | 0.30875800  | 0.77986000  | -0.91470800 |
| H  | 1.23301600  | 1.24243500  | -1.58314100 |
| B  | -1.32229400 | 1.08235100  | -1.43947800 |
| H  | -1.50809400 | 1.66773800  | -2.45315000 |
| B  | -2.33472500 | -0.26593500 | -0.89159100 |
| H  | -3.27473900 | -0.62775700 | -1.51418700 |
| B  | -2.33464500 | -0.26546400 | 0.89223100  |
| H  | -3.27462600 | -0.62693400 | 1.51508100  |
| B  | -1.32193100 | 1.08291800  | 1.43901400  |
| H  | -1.50684900 | 1.66910900  | 2.45239900  |
| B  | -0.69188500 | 1.91809600  | -0.00045000 |
| H  | -0.42512500 | 3.07640600  | -0.00043700 |
| B  | -2.33875900 | 1.26802900  | -0.00006900 |
| H  | -3.28200500 | 1.98390400  | -0.00011700 |
| B  | -0.71708500 | -0.58891700 | -1.50469900 |
| H  | -0.52632500 | -1.12060200 | -2.54766100 |
| Ge | 0.72535600  | -1.22334400 | -0.00007100 |
| Ca | 2.65121600  | 0.78146900  | 0.00008900  |

Sn

S1

|    |             |             |             |
|----|-------------|-------------|-------------|
| B  | -0.72749800 | -0.25051100 | 0.92881400  |
| H  | -1.25994200 | -1.12322900 | 1.61958500  |
| B  | 0.64324200  | 0.73729500  | 1.49279300  |
| H  | 1.14473000  | 0.56286700  | 2.55657500  |
| B  | 1.51107800  | 1.36154600  | 0.00013600  |
| H  | 2.66623100  | 1.64475000  | 0.00019600  |
| B  | 0.64345500  | 0.73736600  | -1.49266800 |
| H  | 1.14516700  | 0.56301800  | -2.55635900 |
| B  | -0.99220500 | 1.41797900  | -1.45153200 |
| H  | -1.60976300 | 1.62462600  | -2.44379800 |
| B  | -1.81137200 | 0.82505800  | -0.00015400 |
| H  | -3.02592900 | 0.62775000  | -0.00024700 |
| B  | -0.99247100 | 1.41789400  | 1.45142700  |
| H  | -1.61016400 | 1.62459300  | 2.44359700  |
| B  | 0.38183700  | 2.37758800  | 0.89169700  |
| H  | 0.76446200  | 3.30893500  | 1.51599700  |
| B  | 0.38196200  | 2.37761900  | -0.89153900 |
| H  | 0.76465600  | 3.30897800  | -1.51577900 |
| B  | -1.15088600 | 2.44024800  | -0.00003400 |
| H  | -1.87285400 | 3.37990800  | -0.00005200 |
| Sn | 1.41448400  | -0.99611100 | 0.00000300  |
| B  | -0.72746500 | -0.25048300 | -0.92900300 |
| H  | -1.25996500 | -1.12320700 | -1.61970800 |
| Ca | -2.61846100 | -1.52757200 | 0.00000800  |

S2

|   |             |            |             |
|---|-------------|------------|-------------|
| B | -0.00724600 | 0.00156000 | -1.49412400 |
|---|-------------|------------|-------------|

|    |             |             |             |
|----|-------------|-------------|-------------|
| H  | -0.05341000 | -0.56255900 | -2.54189600 |
| B  | -1.11509800 | 1.32527100  | -0.91880400 |
| H  | -2.01875300 | 1.73159900  | -1.57687900 |
| B  | -1.11502300 | 1.32516100  | 0.91897800  |
| H  | -2.01861600 | 1.73142700  | 1.57717600  |
| B  | -0.00710400 | 0.00135300  | 1.49407900  |
| H  | -0.05317400 | -0.56284200 | 2.54181300  |
| B  | 1.58232100  | 0.43613900  | 0.89607100  |
| H  | 2.59091000  | 0.13518800  | 1.53708000  |
| B  | 1.58228100  | 0.43622400  | -0.89628400 |
| H  | 2.59081000  | 0.13510900  | -1.53729700 |
| B  | 0.52117800  | 1.70243100  | -1.44588700 |
| H  | 0.76148300  | 2.27898700  | -2.45383700 |
| B  | -0.15356000 | 2.48615100  | 0.00011300  |
| H  | -0.41881500 | 3.64107300  | 0.00021000  |
| B  | 0.52128800  | 1.70225000  | 1.44595600  |
| H  | 0.76175100  | 2.27866000  | 2.45395200  |
| B  | 1.53587300  | 1.96315800  | 0.00000300  |
| H  | 2.47305300  | 2.69191400  | 0.00004100  |
| Sn | -1.76455200 | -0.77586300 | 0.00000000  |
| B  | 0.65629500  | -0.79348800 | -0.00013100 |
| H  | 1.07023400  | -1.95822900 | -0.00034800 |
| Ca | 3.12680500  | -1.28391000 | 0.00000600  |

### S3

|    |             |             |             |
|----|-------------|-------------|-------------|
| B  | -0.22286400 | -0.26094000 | 1.48675800  |
| H  | -0.46178700 | -0.74354100 | 2.54795900  |
| B  | 0.12591400  | -1.28885700 | 0.00024000  |
| H  | 0.15110100  | -2.48070300 | 0.00027100  |
| B  | -0.22277900 | -0.26133900 | -1.48661800 |
| H  | -0.46146900 | -0.74437800 | -2.54767200 |
| B  | -0.78500100 | 1.37914900  | -0.91532700 |
| H  | -1.47565500 | 2.08722600  | -1.57570800 |
| B  | 0.52539300  | 2.12527500  | -0.00024800 |
| H  | 0.73402500  | 3.29274500  | -0.00035400 |
| B  | 0.86872800  | 1.14118400  | 1.45555900  |
| H  | 1.32592300  | 1.60776400  | 2.44736700  |
| B  | 1.38866200  | -0.45657300 | 0.89831400  |
| H  | 2.22543300  | -1.09739200 | 1.53787800  |
| B  | 1.38867200  | -0.45679400 | -0.89792500 |
| H  | 2.22534500  | -1.09793700 | -1.53731400 |
| B  | 0.86886100  | 1.14077800  | -1.45575000 |
| H  | 1.32614400  | 1.60697900  | -2.44769700 |
| B  | 1.86842100  | 1.01632400  | -0.00002200 |
| H  | 3.03417300  | 1.40858100  | 0.00006900  |
| Sn | -2.12062800 | -0.39495300 | 0.00000900  |
| B  | -0.78509700 | 1.37941500  | 0.91493400  |
| H  | -1.47574100 | 2.08769100  | 1.57510700  |
| Ca | 3.68946600  | -0.67337400 | 0.00000400  |

## S4

|    |             |             |             |
|----|-------------|-------------|-------------|
| B  | -0.82569900 | -0.51321500 | -1.51501100 |
| H  | -0.60835700 | -1.01182000 | -2.57112800 |
| B  | -1.38655200 | -1.44831400 | 0.00013700  |
| H  | -1.58547100 | -2.61898700 | 0.00030700  |
| B  | -0.82569300 | -0.51300400 | 1.51526600  |
| H  | -0.60848900 | -1.01137200 | 2.57151400  |
| B  | 0.04687700  | 0.94674300  | 0.93421100  |
| H  | 0.86380500  | 1.54913400  | 1.63413700  |
| B  | -1.05703200 | 1.97178100  | -0.00024700 |
| H  | -0.91849500 | 3.15640600  | -0.00024000 |
| B  | -1.61076900 | 1.07725700  | -1.44164000 |
| H  | -1.86145200 | 1.65196500  | -2.44808500 |
| B  | -2.46353500 | -0.37277200 | -0.89359000 |
| H  | -3.36220600 | -0.83422800 | -1.51208800 |
| B  | -2.46369400 | -0.37266900 | 0.89367500  |
| H  | -3.36235700 | -0.83394200 | 1.51230000  |
| B  | -1.61083200 | 1.07748200  | 1.44149000  |
| H  | -1.86174900 | 1.65256700  | 2.44766000  |
| B  | -2.63404800 | 1.15276200  | -0.00017600 |
| H  | -3.64493000 | 1.76963800  | -0.00015700 |
| Sn | 0.90748100  | -1.15076300 | 0.00000200  |
| B  | 0.04686900  | 0.94655300  | -0.93420000 |
| H  | 0.86411800  | 1.54837800  | -1.63438400 |
| Ca | 2.23160400  | 1.63786900  | 0.00002400  |

## Pb

## S1

|   |             |             |             |
|---|-------------|-------------|-------------|
| H | 2.49882600  | 0.93153700  | -2.44337500 |
| H | 0.98893600  | 3.42155200  | -1.51510900 |
| H | 0.98900200  | 3.42134800  | 1.51543000  |
| H | 2.49894200  | 0.93119300  | 2.44335800  |
| B | 1.84682200  | 0.98581300  | -1.45265200 |
| B | 2.36158000  | 0.11674300  | -0.00011700 |
| B | 1.84695700  | 0.98558900  | 1.45263100  |
| B | 0.96764600  | 2.41306900  | 0.89285700  |
| B | 0.96758100  | 2.41321400  | -0.89263600 |
| H | 3.40246800  | -0.54081800 | -0.00035500 |
| H | 1.09298400  | -1.45240800 | -1.62315600 |
| H | -0.44846400 | 1.06011800  | -2.56224200 |
| H | -1.41491000 | 2.65819900  | 0.00019500  |
| H | -0.44833500 | 1.05964100  | 2.56232900  |
| B | 0.94002100  | -0.44123200 | 0.93005500  |
| B | 0.93996400  | -0.44119500 | -0.93037600 |
| B | 0.07725700  | 1.01348900  | -1.49592200 |
| B | -0.47104400 | 1.93282000  | 0.00012000  |
| B | 0.07738000  | 1.01329700  | 1.49599500  |
| H | 1.09275200  | -1.45250400 | 1.62283100  |

|    |             |             |             |
|----|-------------|-------------|-------------|
| B  | 2.39748500  | 1.86099100  | 0.00001800  |
| H  | 3.43447500  | 2.43495800  | -0.00002000 |
| Pb | -1.42699400 | -0.30065500 | -0.00000100 |
| Ca | 2.17842700  | -2.35410300 | 0.00001800  |

### S2

|    |             |             |             |
|----|-------------|-------------|-------------|
| H  | -2.98654500 | -0.12557100 | 1.53896200  |
| H  | -1.48968500 | 2.25940800  | 2.45346800  |
| H  | -0.52104400 | 3.77902500  | 0.00009000  |
| H  | -1.48958900 | 2.25957200  | -2.45341100 |
| B  | -2.02973900 | 0.31439700  | 0.89747700  |
| B  | -2.02973200 | 0.31443400  | -0.89757300 |
| B  | -1.16509500 | 1.72234300  | -1.44671000 |
| B  | -0.61147300 | 2.59695800  | 0.00005000  |
| B  | -1.16512800 | 1.72226000  | 1.44674400  |
| H  | -2.98650900 | -0.12559200 | -1.53905700 |
| H  | -1.17969800 | -1.97999800 | -0.00014100 |
| H  | -0.27270100 | -0.43136700 | 2.54661600  |
| H  | 1.33740300  | 2.13300500  | 1.58067400  |
| H  | 1.33744600  | 2.13309300  | -1.58054800 |
| B  | -0.39481500 | 0.11706100  | -1.49544700 |
| B  | -0.93589900 | -0.76689500 | -0.00006100 |
| B  | -0.39486100 | 0.11696100  | 1.49542600  |
| B  | 0.50814100  | 1.59111200  | 0.92062400  |
| B  | 0.50816600  | 1.59116600  | -0.92054800 |
| H  | -0.27261500 | -0.43121700 | -2.54665900 |
| B  | -2.20621100 | 1.83243800  | 0.00000400  |
| H  | -3.24011800 | 2.41651800  | 0.00002100  |
| Pb | 1.55613700  | -0.43383800 | 0.00000000  |
| Ca | -3.31281800 | -1.60366500 | 0.00000300  |

### S3

|   |             |             |             |
|---|-------------|-------------|-------------|
| H | -1.86005000 | 1.60982200  | 2.44796000  |
| H | -1.34759400 | 3.32228700  | 0.00121600  |
| H | -1.85939400 | 1.61280200  | -2.44671400 |
| H | -2.62993600 | -1.13072100 | -1.54125100 |
| B | -1.37787300 | 1.16558600  | 1.45707300  |
| B | -1.82098200 | -0.45549400 | 0.89889600  |
| B | -1.82098700 | -0.45475300 | -0.90026200 |
| B | -1.37754000 | 1.16700800  | -1.45638100 |
| B | -1.08123600 | 2.16608300  | 0.00089400  |
| H | -2.62967500 | -1.13252700 | 1.53916700  |
| H | 0.03180600  | -0.65494200 | 2.55200000  |
| H | 0.91222300  | 2.22863400  | 1.57956200  |
| H | 0.91240600  | 2.23028500  | -1.57748200 |
| H | 0.03285100  | -0.65178000 | -2.55308700 |
| B | -0.52268100 | -1.22720900 | -0.00082000 |
| B | -0.22269100 | -0.18340900 | 1.48829300  |
| B | 0.26168300  | 1.48378900  | 0.91713500  |

|    |             |             |             |
|----|-------------|-------------|-------------|
| B  | 0.26197900  | 1.48475100  | -0.91574100 |
| B  | -0.22246800 | -0.18199000 | -1.48880800 |
| H  | -0.49686900 | -2.42013100 | -0.00073600 |
| B  | -2.37019700 | 0.99420000  | 0.00012900  |
| H  | -3.55329300 | 1.33117400  | -0.00026600 |
| Pb | 1.78110800  | -0.24976300 | -0.00002300 |
| Ca | -4.10492000 | -0.78285600 | -0.00002800 |

S4

|    |             |             |             |
|----|-------------|-------------|-------------|
| H  | 2.49965300  | -0.93048400 | 2.44299500  |
| H  | 0.99110300  | -3.42111400 | 1.51517100  |
| H  | 0.99104200  | -3.42119300 | -1.51504400 |
| H  | 2.49951000  | -0.93080000 | -2.44311700 |
| B  | 1.84751800  | -0.98486300 | 1.45234100  |
| B  | 2.36174100  | -0.11529300 | -0.00007500 |
| B  | 1.84743600  | -0.98499000 | -1.45241400 |
| B  | 0.96906000  | -2.41285300 | -0.89257300 |
| B  | 0.96915000  | -2.41279300 | 0.89266800  |
| H  | 3.40178900  | 0.54337500  | -0.00010100 |
| H  | 1.09240400  | 1.45268500  | 1.62334900  |
| H  | -0.44775900 | -1.06028200 | 2.56227600  |
| H  | -1.41328400 | -2.65961300 | 0.00014000  |
| H  | -0.44796600 | -1.06037500 | -2.56213700 |
| B  | 0.93969000  | 0.44151700  | -0.93077800 |
| B  | 0.93981600  | 0.44157200  | 0.93063100  |
| B  | 0.07802400  | -1.01368600 | 1.49598000  |
| B  | -0.46990700 | -1.93364000 | 0.00008200  |
| B  | 0.07790200  | -1.01380500 | -1.49587400 |
| H  | 1.09207500  | 1.45258900  | -1.62353500 |
| B  | 2.39875100  | -1.85982800 | -0.00002400 |
| H  | 3.43595900  | -2.43337800 | 0.00000500  |
| Pb | -1.42691100 | 0.29998600  | 0.00000400  |
| Ca | 2.17581500  | 2.35565400  | -0.00000800 |

$XCB_{10}H_{11}^-$

S1

|   |             |             |             |
|---|-------------|-------------|-------------|
| C | 1.00946000  | 0.17502700  | -1.59044200 |
| B | 0.53235900  | -0.15226900 | 1.67075900  |
| B | 2.15786300  | -0.05027500 | 0.95389000  |
| B | -0.48651700 | -0.94784300 | 0.47493200  |
| B | 1.09904400  | 1.37773200  | 0.95116800  |
| B | 2.05647500  | 0.97111300  | -0.49790800 |
| B | -0.52677900 | 0.80844700  | 0.62632100  |
| B | -0.50504600 | 0.07631100  | -1.03095600 |
| B | 2.09982700  | -0.77530600 | -0.68376200 |
| B | 1.16496500  | -1.48966300 | 0.68639500  |
| B | 0.41610300  | 1.51160000  | -0.68789300 |

|    |             |             |             |
|----|-------------|-------------|-------------|
| H  | 3.13270700  | -0.10941200 | 1.61283500  |
| H  | -1.42875900 | -1.69061200 | 0.66904400  |
| H  | 1.28305900  | 2.33315700  | 1.61794100  |
| H  | 2.95022900  | 1.60729500  | -0.92437400 |
| H  | -1.51451800 | 1.37914700  | 1.06020000  |
| H  | -1.49912900 | 0.00201800  | -1.75036700 |
| H  | 2.93901900  | -1.40891800 | -1.20980900 |
| H  | 1.36294800  | -2.60001300 | 1.02522600  |
| H  | 0.10703500  | 2.49692100  | -1.26017500 |
| H  | 0.31004300  | -0.28409900 | 2.82293200  |
| H  | 0.31193300  | -2.04946600 | -1.51223500 |
| C  | 0.50382900  | -1.22109100 | -0.84504000 |
| Ca | -2.85378900 | -0.00244300 | 0.00734700  |

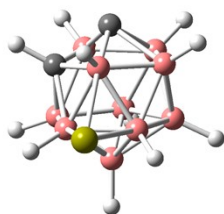

|    |             |             |             |
|----|-------------|-------------|-------------|
| S2 |             |             |             |
| C  | -0.44885000 | -0.00014900 | -1.58019100 |
| B  | -1.09034600 | 0.00015700  | 1.66157400  |
| B  | -0.45802700 | -1.45690900 | 0.82696300  |
| B  | -2.09692900 | 0.88610800  | 0.51257800  |
| B  | 0.53233300  | 0.00054100  | 1.02805800  |
| B  | 0.51303800  | -0.86605800 | -0.52704800 |
| B  | -0.45882500 | 1.45730200  | 0.82651500  |
| B  | -1.08297000 | 1.42702400  | -0.85898700 |
| B  | -1.08231800 | -1.42745000 | -0.85852000 |
| B  | -2.09648000 | -0.88663700 | 0.51287600  |
| B  | 0.51273900  | 0.86666200  | -0.52723300 |
| H  | -0.20419600 | -2.46958600 | 1.37766900  |
| H  | -3.09353200 | 1.47136200  | 0.73180200  |
| H  | 1.51383700  | 0.00102600  | 1.75521300  |
| H  | 1.47995000  | -1.46420500 | -0.97608800 |
| H  | -0.20551400 | 2.47024500  | 1.37696300  |
| H  | -1.35401200 | 2.36065200  | -1.52068200 |
| H  | -1.35273400 | -2.36142500 | -1.51998200 |
| H  | -3.09280400 | -1.47231000 | 0.73225400  |
| H  | 1.47958900  | 1.46485100  | -0.97626400 |
| H  | -1.29414700 | 0.00030000  | 2.82300100  |
| H  | -2.75521300 | -0.00073300 | -1.63658700 |
| C  | -1.94522200 | -0.00043900 | -0.92205200 |
| Ca | 2.86410700  | -0.00001700 | -0.00688600 |

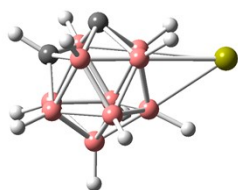

S3

|    |             |             |             |
|----|-------------|-------------|-------------|
| C  | 0.99535900  | 0.08011400  | -1.60035400 |
| B  | 0.51956200  | -0.06812600 | 1.67193400  |
| B  | 1.11402200  | 1.42080800  | 0.86317100  |
| B  | 1.12647800  | -1.46358200 | 0.75518800  |
| B  | -0.52134500 | 0.85452400  | 0.59289100  |
| B  | 0.42339200  | 1.46720700  | -0.77959400 |
| B  | -0.51057400 | -0.92059400 | 0.50445400  |
| B  | 0.45588600  | -1.38964500 | -0.92239500 |
| B  | 2.06403000  | 0.91576500  | -0.56910000 |
| B  | 2.13122400  | -0.02200200 | 0.96415300  |
| B  | -0.53267300 | 0.03773100  | -0.99539100 |
| H  | 1.33976900  | 2.40892800  | 1.46483200  |
| H  | 1.45246500  | -2.51184400 | 1.17882200  |
| H  | -1.49745700 | 1.45635200  | 1.01135100  |
| H  | 0.16796400  | 2.44734400  | -1.38410000 |
| H  | -1.47432700 | -1.58672000 | 0.83607200  |
| H  | 0.29537800  | -2.36278400 | -1.56662900 |
| H  | 3.02548400  | 1.44429300  | -0.99118600 |
| H  | 3.16023000  | -0.11309000 | 1.52675900  |
| H  | -1.50216900 | 0.03193200  | -1.74467100 |
| H  | 0.31580800  | -0.13039800 | 2.83276100  |
| H  | 2.77459400  | -1.27215900 | -0.99466100 |
| C  | 1.94001900  | -0.75448600 | -0.54485600 |
| Ca | -2.85100000 | 0.00369800  | 0.01376800  |

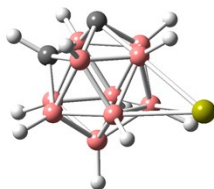

S4

|   |             |             |             |
|---|-------------|-------------|-------------|
| C | 0.00000147  | -0.19794590 | -1.61777260 |
| B | -0.00000115 | 0.17490938  | 1.67524348  |
| B | -1.43632023 | -0.38787171 | 0.78958606  |
| B | 0.88288453  | 1.27309037  | 0.61485769  |
| B | -0.00000729 | -1.42026751 | 0.91482481  |

|    |             |             |             |
|----|-------------|-------------|-------------|
| B  | -0.86796759 | -1.28710286 | -0.62731482 |
| B  | 1.43631502  | -0.38788307 | 0.78958995  |
| B  | 1.40496754  | 0.35565810  | -0.83077499 |
| B  | -1.40496328 | 0.35567236  | -0.83077688 |
| B  | -0.88287554 | 1.27309853  | 0.61485741  |
| B  | 0.86795830  | -1.28711132 | -0.62731038 |
| H  | -2.46693987 | -0.63862752 | 1.32420304  |
| H  | 1.47133542  | 2.25977776  | 0.90760695  |
| H  | -0.00001650 | -2.42478344 | 1.55014950  |
| H  | -1.48544705 | -2.15882373 | -1.14430337 |
| H  | 2.46693290  | -0.63864285 | 1.32420865  |
| H  | 2.34476031  | 0.72074047  | -1.45454822 |
| H  | -2.34474760 | 0.72076493  | -1.45455645 |
| H  | -1.47131496 | 2.25979347  | 0.90760643  |
| H  | 1.48542844  | -2.15883766 | -1.14430063 |
| H  | -0.00000037 | 0.33368964  | 2.85309462  |
| H  | 0.00001029  | 2.11804096  | -1.45755337 |
| C  | 0.00000642  | 1.24727033  | -0.81981386 |
| Ca | 1.11805300  | -1.42201400 | 2.83704700  |

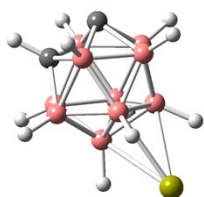

S5

|   |             |             |             |
|---|-------------|-------------|-------------|
| C | -2.07437600 | 0.00083700  | -0.96575900 |
| B | 0.52233400  | -0.00094600 | 1.01199800  |
| B | -0.47332900 | 1.45638600  | 0.82255000  |
| B | 0.50562400  | -0.88941600 | -0.51703000 |
| B | -1.08851500 | 0.00023200  | 1.66807900  |
| B | -2.11561200 | 0.87152100  | 0.51053800  |
| B | -0.47531700 | -1.45670800 | 0.82250000  |
| B | -1.16525700 | -1.41732200 | -0.85099900 |
| B | -1.16360000 | 1.41781300  | -0.85101300 |
| B | 0.50639400  | 0.88756100  | -0.51711600 |
| B | -2.11675800 | -0.86978400 | 0.51047200  |
| H | -0.20855800 | 2.46904000  | 1.36881900  |
| H | 1.44799200  | -1.46712200 | -1.02018700 |
| H | -1.26219600 | 0.00032200  | 2.83464300  |
| H | -3.08093700 | 1.48438100  | 0.79135700  |
| H | -0.21179100 | -2.46961300 | 1.36888800  |
| H | -1.32583600 | -2.35746100 | -1.54186100 |
| H | -1.32271100 | 2.35820500  | -1.54188000 |
| H | 1.44888900  | 1.46475600  | -1.02076900 |
| H | -3.08280400 | -1.48145700 | 0.79139600  |
| H | 1.51405400  | -0.00179100 | 1.72773700  |
| H | -0.38752700 | -0.00023700 | -2.56320400 |



|    |             |             |             |
|----|-------------|-------------|-------------|
| C  | -0.52473100 | -0.00018100 | -1.49124900 |
| Ca | 2.86931200  | 0.00001800  | 0.02486100  |

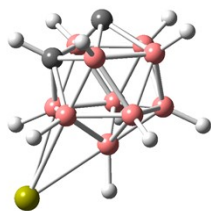

|    |             |             |             |
|----|-------------|-------------|-------------|
| S6 |             |             |             |
| C  | 0.64282500  | 0.00071200  | -0.70366000 |
| B  | -2.25389100 | -0.00056300 | 0.77421100  |
| B  | -1.21763400 | -1.44885700 | 0.77324100  |
| B  | -1.96574700 | 0.88581800  | -0.73405500 |
| B  | -0.76076000 | 0.00019300  | 1.71841500  |
| B  | 0.43049100  | -0.86667300 | 0.74561100  |
| B  | -1.21879000 | 1.44859100  | 0.77296700  |
| B  | -0.28697800 | 1.44010400  | -0.74508800 |
| B  | -0.28569900 | -1.43986000 | -0.74477000 |
| B  | -1.96501000 | -0.88709700 | -0.73387200 |
| B  | 0.43004600  | 0.86799000  | 0.74549000  |
| H  | -1.50390900 | -2.47665500 | 1.27401700  |
| H  | -2.73890300 | 1.46725100  | -1.40379200 |
| H  | -0.71014600 | 0.00025000  | 2.89713300  |
| H  | 1.42058100  | -1.44215000 | 1.15042100  |
| H  | -1.50631400 | 2.47622100  | 1.27336200  |
| H  | 0.11182300  | 2.34799400  | -1.38130600 |
| H  | 0.11418700  | -2.34750900 | -1.38067500 |
| H  | -2.73767700 | -1.46923800 | -1.40356000 |
| H  | 1.42000700  | 1.44387200  | 1.15004700  |
| H  | -3.31960600 | -0.00092000 | 1.27715600  |
| H  | -0.66797200 | -0.00022800 | -2.58334000 |
| C  | -0.74205300 | -0.00019600 | -1.50655600 |
| Ca | 2.80915800  | -0.00001100 | -0.02344600 |

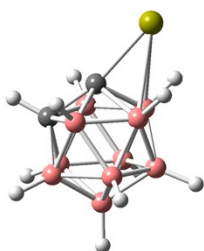

Si  
S1

|    |             |             |             |
|----|-------------|-------------|-------------|
| B  | -0.08545800 | 1.89527000  | 0.08832900  |
| B  | -0.84602700 | 1.23589100  | -1.38180600 |
| B  | 0.72612100  | 0.54735800  | 0.90071800  |
| B  | -1.81383200 | 1.49290100  | 0.07939000  |
| B  | -2.02911500 | 0.02339600  | -0.88371500 |
| B  | -0.82490900 | 1.08499900  | 1.49762800  |
| B  | -0.43551100 | -0.65762200 | 1.43815100  |
| B  | 0.71152900  | 0.64605200  | -0.86845800 |
| B  | -2.04055100 | -0.05398600 | 0.91375000  |
| H  | -0.93040100 | 1.77729100  | -2.42474700 |
| H  | 1.75344700  | 0.73256300  | 1.53419900  |
| H  | -2.64033900 | 2.33302900  | 0.10325800  |
| H  | -2.92833000 | -0.16078500 | -1.62669400 |
| H  | -0.90294300 | 1.64063300  | 2.53591000  |
| H  | -0.20622300 | -1.28166400 | 2.41848200  |
| H  | -0.31349100 | -0.88099000 | -2.32868400 |
| H  | 1.69762600  | 0.80355600  | -1.56500600 |
| H  | -3.02880900 | -0.25692100 | 1.53125500  |
| H  | 0.35893800  | 2.98949100  | 0.11827000  |
| B  | 0.48338800  | -0.92583700 | -0.06368400 |
| H  | 1.37337000  | -1.74333000 | -0.24767200 |
| Si | -1.44453800 | -1.84030800 | -0.03982700 |
| C  | -0.47020300 | -0.43357400 | -1.35623800 |
| Ca | 2.97918700  | -0.20146100 | 0.00224600  |

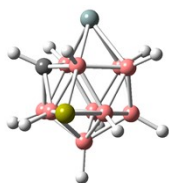

S2

|   |             |             |             |
|---|-------------|-------------|-------------|
| B | -0.95539100 | -1.91629900 | -0.00001800 |
| B | -2.02987600 | -0.82729100 | -0.88728700 |
| B | -0.37249700 | -1.04571400 | 1.45130400  |
| B | -0.37224200 | -1.04573000 | -1.45125300 |
| B | -1.10256800 | 0.57063600  | -1.44132900 |
| B | 0.62377400  | -1.17719300 | 0.00013100  |
| B | 0.56213600  | 0.35683600  | 0.89892300  |
| B | -2.03002300 | -0.82727600 | 0.88707700  |

|    |             |             |             |
|----|-------------|-------------|-------------|
| B  | 0.56221700  | 0.35684000  | -0.89868000 |
| H  | -3.00210800 | -1.12971100 | -1.47741500 |
| H  | -0.09027300 | -1.59064200 | 2.45987800  |
| H  | -0.08987300 | -1.59064000 | -2.45979700 |
| H  | -1.45581000 | 1.13165300  | -2.41756900 |
| H  | 1.63248600  | -1.86532600 | 0.00027500  |
| H  | 1.52241600  | 0.71514400  | 1.56317800  |
| H  | -2.94581700 | 1.15304300  | -0.00017700 |
| H  | -3.00233800 | -1.12970600 | 1.47706200  |
| H  | 1.52248900  | 0.71526800  | -1.56290100 |
| H  | -1.09020500 | -3.08768100 | -0.00001300 |
| B  | -1.10278000 | 0.57065100  | 1.44126600  |
| H  | -1.45621700 | 1.13165900  | 2.41744100  |
| Si | -0.46615700 | 2.01545800  | 0.00001300  |
| C  | -2.00614600 | 0.61602400  | -0.00010300 |
| Ca | 2.90522900  | -0.07214500 | -0.00001000 |

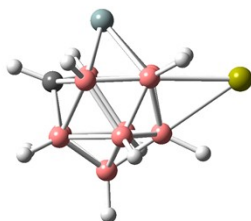

|    |             |             |             |
|----|-------------|-------------|-------------|
| S3 |             |             |             |
| B  | -0.08543300 | 1.88788700  | 0.06002300  |
| B  | -1.80383700 | 1.48875400  | 0.05471100  |
| B  | 0.71966200  | 0.61472800  | -0.87762600 |
| B  | -0.83095400 | 1.09933600  | 1.48321100  |
| B  | -2.02502300 | -0.05462800 | 0.88886700  |
| B  | 0.72445300  | 0.56135500  | 0.89969000  |
| B  | 0.52125300  | -0.93435700 | -0.03507000 |
| B  | -0.83861400 | 1.20031000  | -1.39783300 |
| B  | -0.43588200 | -0.64164800 | 1.45055600  |
| H  | -2.69370100 | 2.25781400  | 0.01394500  |
| H  | 1.72261500  | 0.84576500  | -1.53054800 |
| H  | -0.94621000 | 1.67035200  | 2.50850300  |
| H  | -3.07200500 | -0.23523400 | 1.40349500  |

|    |             |             |             |
|----|-------------|-------------|-------------|
| H  | 1.74292600  | 0.77267400  | 1.54050300  |
| H  | 1.42173000  | -1.75920300 | -0.09344700 |
| H  | -2.81317700 | -0.06883200 | -1.39698400 |
| H  | -1.04507000 | 1.77166200  | -2.40620600 |
| H  | -0.24522600 | -1.23564800 | 2.45636900  |
| H  | 0.33270800  | 2.99194900  | 0.08057500  |
| B  | -0.46661100 | -0.54297700 | -1.46421700 |
| H  | -0.39444400 | -1.04459400 | -2.53084500 |
| Si | -1.39735800 | -1.85869500 | -0.02719000 |
| C  | -1.90940200 | 0.03474300  | -0.81104000 |
| Ca | 2.98071100  | -0.17736200 | -0.00550000 |

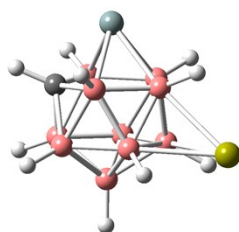

|    |             |             |             |
|----|-------------|-------------|-------------|
| S4 |             |             |             |
| B  | 0.87969700  | 1.05520700  | 0.07419400  |
| B  | -0.66283600 | 1.87151000  | 0.13584600  |
| B  | 0.69758600  | -0.40739100 | -0.92517800 |
| B  | -0.13787500 | 0.87903200  | 1.51661700  |
| B  | -1.79754900 | 0.78427800  | 0.93731200  |
| B  | 0.69630200  | -0.53152400 | 0.85117600  |
| B  | -0.39891900 | -1.52328800 | -0.10940000 |
| B  | -0.13220600 | 1.08319500  | -1.37111200 |
| B  | -0.93810800 | -0.71051100 | 1.41531900  |
| H  | -0.81362800 | 3.03899600  | 0.14689300  |
| H  | 1.61961500  | -0.81488400 | -1.61018700 |
| H  | 0.17510200  | 1.36516800  | 2.54600400  |
| H  | -2.70343300 | 1.29634700  | 1.49436300  |
| H  | 1.62728300  | -1.04541500 | 1.45261300  |
| H  | -0.21065300 | -2.68798100 | -0.21153000 |

|    |             |             |             |
|----|-------------|-------------|-------------|
| H  | -2.44887600 | 1.38015500  | -1.30942100 |
| H  | 0.08199000  | 1.71462400  | -2.34257300 |
| H  | -1.14897500 | -1.30873000 | 2.41342300  |
| H  | 1.92951100  | 1.67377300  | 0.09829900  |
| B  | -0.95197200 | -0.49381500 | -1.47637800 |
| H  | -1.23366000 | -0.84854000 | -2.56646900 |
| Si | -2.46344400 | -0.99349200 | -0.04528000 |
| C  | -1.67777400 | 0.85902200  | -0.75779300 |
| Ca | 3.07049900  | -0.25211100 | -0.00863600 |

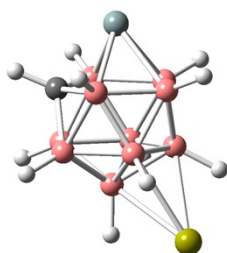

|    |             |             |             |
|----|-------------|-------------|-------------|
| S5 |             |             |             |
| B  | -0.88113600 | 1.03231900  | -0.00005200 |
| B  | -0.68423800 | -0.49110300 | 0.89021000  |
| B  | 0.12477900  | 0.96417800  | -1.45536700 |
| B  | 0.12664000  | 0.96761300  | 1.45389500  |
| B  | 0.96141600  | -0.60468300 | 1.43831500  |
| B  | 0.64577300  | 1.87433200  | -0.00215500 |
| B  | 1.79789700  | 0.88233500  | -0.90222400 |
| B  | -0.68479300 | -0.49328900 | -0.88691400 |
| B  | 1.79897000  | 0.88444500  | 0.89895200  |
| H  | -1.58108700 | -1.07588900 | 1.47012800  |
| H  | -0.22165600 | 1.47434900  | -2.46310200 |
| H  | -0.21855100 | 1.48040300  | 2.46071700  |
| H  | 1.12511800  | -1.25929800 | 2.40829700  |
| H  | 0.66649500  | 3.05438100  | -0.00349800 |
| H  | 2.64477200  | 1.38548300  | -1.55654400 |
| H  | 0.28705600  | -2.44157600 | 0.00323800  |

|    |             |             |             |
|----|-------------|-------------|-------------|
| H  | -1.58150500 | -1.08002900 | -1.46520200 |
| H  | 2.64651200  | 1.38921000  | 1.55115400  |
| H  | -1.94670400 | 1.62902400  | 0.00023800  |
| B  | 0.95991200  | -0.60804500 | -1.43704900 |
| H  | 1.12195900  | -1.26505300 | -2.40569100 |
| Si | 2.52369100  | -0.90141300 | 0.00011600  |
| C  | 0.43718100  | -1.36984200 | 0.00194500  |
| Ca | -3.08616300 | -0.22463400 | -0.00005400 |

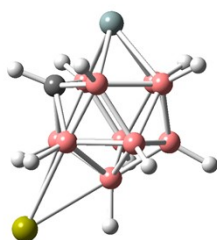

|    |             |             |             |
|----|-------------|-------------|-------------|
| S6 |             |             |             |
| B  | -2.06893800 | 1.30358800  | -0.00009200 |
| B  | -2.25279800 | -0.22123300 | 0.88860100  |
| B  | -1.08095700 | 0.98488400  | -1.44203100 |
| B  | -1.08065000 | 0.98547600  | 1.44177000  |
| B  | -0.67154200 | -0.74139300 | 1.46158900  |
| B  | -0.35546400 | 1.73895000  | -0.00041100 |
| B  | 0.50283000  | 0.47524600  | -0.90001100 |
| B  | -2.25294700 | -0.22157200 | -0.88805700 |
| B  | 0.50298300  | 0.47563300  | 0.89949300  |
| H  | -3.20049200 | -0.59419600 | 1.47840200  |
| H  | -1.19941800 | 1.55813600  | -2.46619300 |
| H  | -1.19865100 | 1.55913200  | 2.46575800  |
| H  | -0.59737400 | -1.41932800 | 2.42560600  |
| H  | 0.04944000  | 2.85094800  | -0.00063300 |
| H  | 1.46645800  | 0.77359300  | -1.58879500 |
| H  | -1.77032800 | -2.36119300 | 0.00068800  |

|    |             |             |             |
|----|-------------|-------------|-------------|
| H  | -3.20068500 | -0.59482000 | -1.47761700 |
| H  | 1.46674100  | 0.77421400  | 1.58800500  |
| H  | -2.92962400 | 2.10877300  | -0.00025600 |
| B  | -0.67189800 | -0.74198400 | -1.46139400 |
| H  | -0.59794500 | -1.42001000 | -2.42535600 |
| Si | 0.64362800  | -1.45197100 | 0.00005100  |
| C  | -1.36146200 | -1.35874000 | 0.00034400  |
| Ca | 2.90083800  | 0.25284100  | 0.00001700  |

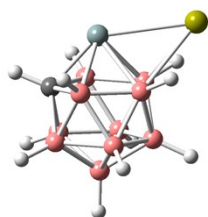

|    |             |             |             |
|----|-------------|-------------|-------------|
| Ge |             |             |             |
| S1 |             |             |             |
| C  | -0.24987300 | -0.05353000 | -1.36867200 |
| H  | -0.21329600 | -0.51964900 | -2.34415400 |
| B  | -1.63492600 | 0.80177500  | -0.89195500 |
| H  | -2.54409600 | 0.88663300  | -1.64137900 |
| B  | -1.67806000 | 0.73686900  | 0.92084700  |
| H  | -2.68007900 | 0.83335500  | 1.54313800  |
| B  | -0.28731200 | -0.28853700 | 1.44861500  |
| H  | -0.22044100 | -0.93826100 | 2.43729100  |
| B  | 0.52447600  | -0.79359000 | -0.07026400 |
| H  | 1.16795000  | -1.81610500 | -0.25678400 |
| B  | 1.17130900  | 0.66113100  | -0.86854600 |
| H  | 2.16956400  | 0.55474100  | -1.55835000 |
| B  | -0.16663400 | 1.65112100  | -1.38180600 |
| H  | -0.09936200 | 2.20591600  | -2.41912100 |
| B  | -1.03564100 | 2.15414700  | 0.07813800  |
| H  | -1.60051900 | 3.18867400  | 0.10358800  |
| B  | -0.19484700 | 1.49279500  | 1.49926800  |
| H  | -0.11810200 | 2.05077600  | 2.53662500  |
| B  | 1.15207000  | 0.55400800  | 0.90163100  |
| H  | 2.19009300  | 0.45802100  | 1.53808700  |
| B  | 0.73712800  | 2.07521900  | 0.09406000  |
| H  | 1.46060500  | 3.00853300  | 0.13089200  |
| Ge | -1.67138200 | -1.23907400 | -0.01849200 |
| Ca | 3.12666600  | -0.75828900 | 0.00420000  |

|    |             |             |             |
|----|-------------|-------------|-------------|
| S2 |             |             |             |
| C  | -1.97697200 | 0.03425500  | -0.00024400 |
| H  | -2.99216600 | -0.34018300 | -0.00042100 |
| B  | -1.06759300 | -0.07273700 | 1.44220000  |
| H  | -1.50793700 | -0.55319500 | 2.42624900  |
| B  | 0.62658900  | -0.12040600 | 0.90650900  |

|    |             |             |             |
|----|-------------|-------------|-------------|
| H  | 1.52650500  | -0.60071000 | 1.57853000  |
| B  | 0.62677800  | -0.12041600 | -0.90597800 |
| H  | 1.52661300  | -0.60101100 | -1.57793900 |
| B  | -1.06710000 | -0.07274000 | -1.44235900 |
| H  | -1.50701000 | -0.55325900 | -2.42657100 |
| B  | -1.76230100 | 1.45412300  | -0.88739100 |
| H  | -2.66928100 | 1.91117800  | -1.48225800 |
| B  | -1.76263400 | 1.45412000  | 0.88693400  |
| H  | -2.66979400 | 1.91121600  | 1.48149300  |
| B  | -0.09064800 | 1.40592200  | 1.45114400  |
| H  | 0.27277400  | 1.90298500  | 2.45860300  |
| B  | 0.91500400  | 1.38262900  | 0.00030300  |
| H  | 2.01447800  | 1.91407900  | 0.00068800  |
| B  | -0.09007500 | 1.40591200  | -1.45101300 |
| H  | 0.27365000  | 1.90291000  | -2.45839500 |
| B  | -0.52792700 | 2.35866200  | -0.00001700 |
| H  | -0.47496200 | 3.53662200  | 0.00001400  |
| Ge | -0.65519400 | -1.72149500 | 0.00000800  |
| Ca | 3.00173500  | -0.04618400 | -0.00002300 |

### S3

|    |             |             |             |
|----|-------------|-------------|-------------|
| C  | -1.53485800 | 0.81012200  | -0.81797900 |
| H  | -2.42869300 | 0.97001200  | -1.40606600 |
| B  | -1.67220100 | 0.74074200  | 0.88764500  |
| H  | -2.72400100 | 0.87539900  | 1.40722900  |
| B  | -0.29718500 | -0.26680200 | 1.46184500  |
| H  | -0.26514300 | -0.87535500 | 2.47694900  |
| B  | 0.55021700  | -0.81429100 | -0.03465500 |
| H  | 1.20545000  | -1.84451300 | -0.09644200 |
| B  | -0.30854200 | -0.15395700 | -1.46621200 |
| H  | -0.36773900 | -0.64292100 | -2.53978500 |
| B  | -0.18058800 | 1.62432700  | -1.39512300 |
| H  | -0.20992100 | 2.23452700  | -2.40175100 |
| B  | -1.02953400 | 2.16413000  | 0.05722200  |
| H  | -1.66636800 | 3.15355800  | 0.02617300  |
| B  | -0.20525200 | 1.51343500  | 1.48556100  |
| H  | -0.15668100 | 2.09477100  | 2.51060800  |
| B  | 1.14412200  | 0.56861700  | 0.90273200  |
| H  | 2.18084500  | 0.49678500  | 1.54568700  |
| B  | 1.15174100  | 0.62434800  | -0.87683900 |
| H  | 2.17824000  | 0.57872400  | -1.53326800 |
| B  | 0.73257200  | 2.06858400  | 0.06632000  |
| H  | 1.44100700  | 3.01311800  | 0.09125800  |
| Ge | -1.62372500 | -1.27393000 | -0.01346900 |
| Ca | 3.12773000  | -0.72473700 | -0.00921000 |

### S4

|   |             |            |             |
|---|-------------|------------|-------------|
| C | -1.13070800 | 1.20407700 | -0.76063100 |
| H | -1.82099300 | 1.82685100 | -1.31352700 |



|    |             |             |             |
|----|-------------|-------------|-------------|
| B  | -1.26233500 | 1.13806500  | 0.93840300  |
| H  | -2.08001000 | 1.77766300  | 1.50088100  |
| B  | -0.59911700 | -0.46416600 | 1.43305100  |
| H  | -0.86544100 | -1.02133300 | 2.44220900  |
| B  | -0.17087800 | -1.34988600 | -0.10304100 |
| H  | -0.11575500 | -2.52891900 | -0.20588300 |
| B  | -0.59718200 | -0.24234600 | -1.47375400 |
| H  | -0.91144600 | -0.55403600 | -2.56849300 |
| B  | 0.42675100  | 1.21049800  | -1.37075600 |
| H  | 0.73059000  | 1.80310600  | -2.34318000 |
| B  | 0.00711700  | 2.06342200  | 0.13499300  |
| H  | 0.01929800  | 3.24074200  | 0.15155100  |
| B  | 0.39426200  | 1.00995300  | 1.51783700  |
| H  | 0.77353200  | 1.45327400  | 2.54452400  |
| B  | 1.03689500  | -0.50077400 | 0.85482400  |
| H  | 1.89646800  | -1.12865800 | 1.45507100  |
| B  | 1.04825600  | -0.37905400 | -0.92443900 |
| H  | 1.90895200  | -0.90349500 | -1.61080700 |
| B  | 1.42590800  | 1.04651800  | 0.07513600  |
| H  | 2.54844100  | 1.52002000  | 0.09793500  |
| Ge | -2.25885400 | -0.61234000 | -0.02240000 |
| Ca | 3.42177800  | -0.53879700 | -0.01404800 |

#### S5

|    |             |             |             |
|----|-------------|-------------|-------------|
| C  | 0.49466500  | -0.22463700 | -1.37861600 |
| H  | 0.71451500  | -0.61143400 | -2.36474200 |
| B  | 0.17870800  | -1.33281300 | -0.11674300 |
| H  | 0.12910400  | -2.49539700 | -0.33015800 |
| B  | 0.60123000  | -0.48037700 | 1.42520700  |
| H  | 0.85777400  | -1.07714000 | 2.41460600  |
| B  | 1.27905700  | 1.13214800  | 0.95730900  |
| H  | 2.07255600  | 1.71610100  | 1.61231800  |
| B  | 1.24329100  | 1.21457800  | -0.84871000 |
| H  | 1.98361100  | 1.78303600  | -1.57224100 |
| B  | -0.43348200 | 1.19757600  | -1.37663900 |
| H  | -0.78914600 | 1.68344600  | -2.39074200 |
| B  | -1.07370200 | -0.37910800 | -0.91159400 |
| H  | -1.90551700 | -0.92653300 | -1.61089800 |
| B  | -1.03992600 | -0.50899000 | 0.85994300  |
| H  | -1.89438200 | -1.15471500 | 1.44546600  |
| B  | -0.38325800 | 0.99918500  | 1.51631500  |
| H  | -0.77052200 | 1.43050400  | 2.54623200  |
| B  | 0.02067900  | 2.04647700  | 0.11938500  |
| H  | -0.06638500 | 3.22186000  | 0.17196100  |
| B  | -1.41883400 | 1.04955500  | 0.08542100  |
| H  | -2.54144000 | 1.52554600  | 0.10979000  |
| Ge | 2.28400300  | -0.57354000 | -0.01328600 |
| Ca | -3.43575300 | -0.50426600 | 0.00579100  |

**S6**

|    |             |             |             |
|----|-------------|-------------|-------------|
| H  | 0.67587200  | -0.82460400 | -2.37339500 |
| B  | -0.31497200 | 0.74525600  | -0.86178700 |
| H  | -1.21425400 | 1.10007000  | -1.60419500 |
| B  | -0.35006100 | 0.64841400  | 0.95400500  |
| H  | -1.29863900 | 1.00907700  | 1.63675700  |
| B  | 0.75654400  | -0.67528600 | 1.45449000  |
| H  | 0.60616800  | -1.31359600 | 2.43890000  |
| B  | 1.44693900  | -1.36769500 | -0.10570300 |
| H  | 1.77970000  | -2.47791600 | -0.32983400 |
| B  | 2.36248200  | -0.07859700 | -0.90115100 |
| H  | 3.24075400  | -0.39862600 | -1.61669500 |
| B  | 1.28175300  | 1.23564200  | -1.36177100 |
| H  | 1.39306700  | 1.80171500  | -2.38945000 |
| B  | 0.57063800  | 1.91260500  | 0.12022500  |
| H  | 0.21433100  | 3.04158700  | 0.17046800  |
| B  | 1.26201900  | 1.03175400  | 1.50826500  |
| H  | 1.40361000  | 1.55701400  | 2.55585200  |
| B  | 2.35668200  | -0.21580900 | 0.87739200  |
| H  | 3.31640500  | -0.57662800 | 1.45887900  |
| B  | 2.26963300  | 1.38349200  | 0.10100900  |
| H  | 3.16275300  | 2.15188500  | 0.13800300  |
| Ge | -0.68756000 | -1.32854800 | -0.01773600 |
| Ca | -2.71007300 | 0.83525600  | -0.00581600 |

**Sn****S1**

|   |             |             |             |
|---|-------------|-------------|-------------|
| C | 0.10074500  | 0.16381800  | -1.37821200 |
| H | 0.04727900  | -0.27693400 | -2.36554000 |
| B | -1.02547800 | 1.33183000  | -0.90103100 |
| H | -1.87055400 | 1.65771700  | -1.66490100 |
| B | -1.10703700 | 1.27979100  | 0.91375100  |
| H | -2.04133300 | 1.65027600  | 1.54527800  |
| B | -0.01784000 | -0.07730200 | 1.44080700  |
| H | -0.09782600 | -0.71180100 | 2.44160400  |
| B | 0.64984900  | -0.75043500 | -0.08218500 |
| H | 1.03198800  | -1.89712500 | -0.28026200 |
| B | 1.64758900  | 0.50119700  | -0.86295500 |
| H | 2.59977800  | 0.16336300  | -1.54544000 |
| B | 0.60457300  | 1.79792400  | -1.37518500 |
| H | 0.82455800  | 2.33079100  | -2.40333000 |
| B | -0.12541300 | 2.48999900  | 0.08303100  |
| H | -0.41012500 | 3.63418600  | 0.11547800  |
| B | 0.50973400  | 1.62640300  | 1.50629500  |
| H | 0.71604500  | 2.14051000  | 2.54920200  |
| B | 1.58596100  | 0.38626300  | 0.90848100  |
| H | 2.56452100  | 0.03641000  | 1.55216700  |
| B | 1.57108100  | 1.96965600  | 0.11246600  |
| H | 2.50429600  | 2.69255200  | 0.16722200  |

|    |             |             |             |
|----|-------------|-------------|-------------|
| Sn | -1.83538900 | -0.76679600 | -0.01331300 |
| Ca | 3.19156400  | -1.34198400 | 0.00530200  |

## S2

|    |             |             |             |
|----|-------------|-------------|-------------|
| C  | -1.32488400 | 1.38881300  | -0.00055400 |
| H  | -2.36127800 | 1.70357000  | -0.00094900 |
| B  | -0.64453600 | 0.76564400  | 1.43492000  |
| H  | -1.28122900 | 0.65084600  | 2.42578700  |
| B  | 0.70889400  | -0.26687000 | 0.91241800  |
| H  | 1.19601500  | -1.15708200 | 1.59727800  |
| B  | 0.70919900  | -0.26709700 | -0.91130400 |
| H  | 1.19596300  | -1.15769100 | -1.59601500 |
| B  | -0.64364300 | 0.76507000  | -1.43532500 |
| H  | -1.27960000 | 0.64968000  | -2.42659300 |
| B  | -0.32432600 | 2.41288800  | -0.88936300 |
| H  | -0.78890900 | 3.31613600  | -1.48496900 |
| B  | -0.32494000 | 2.41326500  | 0.88841400  |
| H  | -0.78981100 | 3.31676400  | 1.48341000  |
| B  | 1.00520700  | 1.39955200  | 1.45170300  |
| H  | 1.59290300  | 1.59534800  | 2.45733900  |
| B  | 1.80979700  | 0.79518700  | 0.00068900  |
| H  | 3.01602900  | 0.60199100  | 0.00143400  |
| B  | 1.00626400  | 1.39887000  | -1.45135800 |
| H  | 1.59449000  | 1.59428300  | -2.45676100 |
| B  | 1.20505500  | 2.42708100  | 0.00001500  |
| H  | 1.93694400  | 3.35197800  | 0.00008800  |
| Sn | -1.45047100 | -1.01870200 | 0.00000600  |
| Ca | 2.69532400  | -1.55407800 | -0.00005400 |

## S3

|   |             |             |             |
|---|-------------|-------------|-------------|
| C | 0.92657900  | 1.36449000  | -0.82363200 |
| H | 1.72571800  | 1.78839900  | -1.41865400 |
| B | 0.00944700  | 0.10606400  | -1.46523800 |
| H | 0.18699000  | -0.32993300 | -2.55146600 |
| B | -0.63926400 | -0.78380500 | -0.04591700 |
| H | -1.02090400 | -1.94630700 | -0.11320300 |
| B | 0.03968100  | -0.03028900 | 1.46011100  |
| H | 0.15066400  | -0.61619900 | 2.48621900  |
| B | 1.08286700  | 1.31765100  | 0.87826800  |
| H | 2.05542500  | 1.75091400  | 1.39688100  |
| B | 0.07834800  | 2.52130400  | 0.06691000  |
| H | 0.41336300  | 3.64998200  | 0.04394200  |
| B | -0.60034400 | 1.78018900  | -1.38803600 |
| H | -0.75258000 | 2.38587700  | -2.38690600 |
| B | -1.60429100 | 0.45016000  | -0.87544200 |
| H | -2.58550000 | 0.14101500  | -1.53172800 |
| B | -1.57178200 | 0.38356700  | 0.90849600  |
| H | -2.54754900 | 0.03523600  | 1.55834600  |
| B | -0.52918700 | 1.65913200  | 1.49242000  |
| H | -0.73291300 | 2.19975000  | 2.52119600  |

|    |             |             |             |
|----|-------------|-------------|-------------|
| B  | -1.59086700 | 1.94576100  | 0.08173500  |
| H  | -2.53185800 | 2.65902300  | 0.11919300  |
| Sn | 1.79991400  | -0.79256500 | -0.00999100 |
| Ca | -3.16445300 | -1.35125500 | -0.01245200 |

#### S4

|    |             |             |             |
|----|-------------|-------------|-------------|
| C  | -0.62009100 | 1.40473600  | -0.75460100 |
| H  | -1.23112200 | 2.10737200  | -1.30675000 |
| B  | -0.75890700 | 1.32784600  | 0.93823000  |
| H  | -1.50959400 | 2.04541500  | 1.50677100  |
| B  | -0.24391800 | -0.32904900 | 1.43205700  |
| H  | -0.52995300 | -0.86780900 | 2.44926500  |
| B  | 0.10713800  | -1.24003600 | -0.12287700 |
| H  | 0.08896700  | -2.42237400 | -0.23506400 |
| B  | -0.21838800 | -0.07645700 | -1.47273600 |
| H  | -0.54751600 | -0.33984500 | -2.57885300 |
| B  | 0.93111600  | 1.27488200  | -1.36263300 |
| H  | 1.29846100  | 1.84835000  | -2.32532000 |
| B  | 0.58678200  | 2.14819900  | 0.15307400  |
| H  | 0.71445400  | 3.31899900  | 0.18216700  |
| B  | 0.87292900  | 1.05008600  | 1.52610000  |
| H  | 1.29326500  | 1.44811700  | 2.55603500  |
| B  | 1.37594300  | -0.50985800 | 0.85030200  |
| H  | 2.17695600  | -1.21577300 | 1.44715100  |
| B  | 1.40478900  | -0.36931400 | -0.93266600 |
| H  | 2.22042000  | -0.95835900 | -1.62336100 |
| B  | 1.90752500  | 1.00581100  | 0.08498300  |
| H  | 3.06757300  | 1.37638500  | 0.11688300  |
| Sn | -2.15988700 | -0.42251400 | -0.01546500 |
| Ca | 3.74239800  | -0.75268700 | -0.01786200 |

#### S5

|   |             |             |             |
|---|-------------|-------------|-------------|
| C | -0.19193600 | -1.15646600 | 0.00017600  |
| H | -0.18746500 | -2.23946500 | 0.00028500  |
| B | 0.20423500  | -0.31151600 | 1.42718800  |
| H | 0.45084600  | -0.93191800 | 2.40633600  |
| B | 0.77830400  | 1.32223300  | 0.91382300  |
| H | 1.48433300  | 2.00142500  | 1.58300100  |
| B | 0.77823800  | 1.32203700  | -0.91411000 |
| H | 1.48424200  | 2.00107100  | -1.58347600 |
| B | 0.20415600  | -0.31181600 | -1.42707600 |
| H | 0.45063900  | -0.93245700 | -2.40610600 |
| B | -1.43515400 | -0.47530000 | -0.89075400 |
| H | -2.23316000 | -1.18996500 | -1.47385200 |
| B | -1.43514400 | -0.47510400 | 0.89105600  |
| H | -2.23319300 | -1.18959900 | 1.47428700  |
| B | -0.87795400 | 1.09697800  | 1.45684700  |
| H | -1.31252000 | 1.54553300  | 2.46075000  |
| B | -0.51787300 | 2.08662200  | -0.00018500 |
| H | -0.70629900 | 3.25258900  | -0.00029700 |

|    |             |             |             |
|----|-------------|-------------|-------------|
| B  | -0.87807100 | 1.09665900  | -1.45696800 |
| H  | -1.31271300 | 1.54496400  | -2.46095200 |
| B  | -1.88112400 | 0.99816800  | 0.00000200  |
| H  | -3.02718400 | 1.41762400  | 0.00003800  |
| Sn | 2.20719300  | -0.36076200 | 0.00000000  |
| Ca | -3.83818000 | -0.60238500 | -0.00001000 |

## S6

|    |             |             |             |
|----|-------------|-------------|-------------|
| C  | 0.14108800  | 1.02687100  | -0.80178500 |
| H  | -0.45267800 | 1.66184600  | -1.47885600 |
| B  | 0.04733900  | 0.94600900  | 0.91982900  |
| H  | -0.73010000 | 1.65303300  | 1.54535500  |
| B  | 0.77892900  | -0.59499100 | 1.47544500  |
| H  | 0.48620100  | -1.10440100 | 2.50513600  |
| B  | 1.26675200  | -1.49625100 | -0.07992600 |
| H  | 1.36039000  | -2.67401400 | -0.17643300 |
| B  | 0.76728300  | -0.39744200 | -1.49586200 |
| H  | 0.41135600  | -0.71145200 | -2.58044700 |
| B  | 1.73558500  | 1.08397900  | -1.38474900 |
| H  | 1.93100800  | 1.69898500  | -2.37139900 |
| B  | 1.26698600  | 1.93871300  | 0.09501000  |
| H  | 1.13807500  | 3.11608300  | 0.10211800  |
| B  | 1.69672000  | 0.92275300  | 1.48696200  |
| H  | 1.96186500  | 1.43217000  | 2.51848200  |
| B  | 2.43271900  | -0.56921100 | 0.86743300  |
| H  | 3.27821100  | -1.14174700 | 1.45826900  |
| B  | 2.42796500  | -0.47253100 | -0.92540400 |
| H  | 3.25613500  | -0.97956300 | -1.59469300 |
| B  | 2.75131100  | 0.97479300  | 0.06088500  |
| H  | 3.80580900  | 1.50187400  | 0.08465300  |
| Sn | -0.97856200 | -1.12492200 | -0.01465100 |
| Ca | -2.21113200 | 1.69764900  | 0.02164700  |

## Pb

### S1

|   |             |             |             |
|---|-------------|-------------|-------------|
| C | 0.55347400  | 0.26555700  | -1.38405700 |
| H | 0.44800200  | -0.15715200 | -2.37526200 |
| B | -0.40264500 | 1.56938500  | -0.90540500 |
| H | -1.18897400 | 2.01694900  | -1.67228800 |
| B | -0.50274800 | 1.52938500  | 0.91084500  |
| H | -1.37233100 | 2.03444300  | 1.54375200  |
| B | 0.38467400  | 0.02893900  | 1.43542000  |
| H | 0.22193800  | -0.58808000 | 2.43828400  |
| B | 0.95688300  | -0.71947800 | -0.09171000 |
| H | 1.18084100  | -1.90825600 | -0.29431000 |
| B | 2.12734200  | 0.38273300  | -0.86061700 |
| H | 3.03185700  | -0.07632800 | -1.53873600 |

|    |             |             |             |
|----|-------------|-------------|-------------|
| B  | 1.27757400  | 1.81415300  | -1.37035500 |
| H  | 1.57808000  | 2.31907900  | -2.39262900 |
| B  | 0.63992500  | 2.59250400  | 0.08715800  |
| H  | 0.51746000  | 3.76547000  | 0.12511300  |
| B  | 1.14202200  | 1.64314200  | 1.51140000  |
| H  | 1.41435100  | 2.12056900  | 2.55706700  |
| B  | 2.03839100  | 0.26837000  | 0.91167500  |
| H  | 2.95625400  | -0.21488000 | 1.55929500  |
| B  | 2.24838800  | 1.84296000  | 0.12455800  |
| H  | 3.27284200  | 2.42891100  | 0.18971900  |
| Pb | -1.62003900 | -0.42767600 | -0.00879300 |
| Ca | 3.39564900  | -1.65125600 | 0.00602700  |

## S2

|    |             |             |             |
|----|-------------|-------------|-------------|
| C  | -0.24900600 | 1.90372100  | 0.00004900  |
| H  | -1.06145600 | 2.62002700  | 0.00008600  |
| B  | 0.10659100  | 1.04902000  | 1.42867700  |
| H  | -0.51557000 | 1.21267600  | 2.42310700  |
| B  | 0.91517800  | -0.45437300 | 0.91291900  |
| H  | 1.00733500  | -1.46288600 | 1.60308800  |
| B  | 0.91516000  | -0.45434200 | -0.91302200 |
| H  | 1.00738800  | -1.46283200 | -1.60320700 |
| B  | 0.10653900  | 1.04910500  | -1.42864300 |
| H  | -0.51566000 | 1.21283900  | -2.42303700 |
| B  | 1.08146600  | 2.41989800  | -0.88921000 |
| H  | 1.03628300  | 3.43402000  | -1.48660300 |
| B  | 1.08150200  | 2.41983900  | 0.88929900  |
| H  | 1.03633000  | 3.43392800  | 1.48675000  |
| B  | 1.87066300  | 0.94449800  | 1.45186700  |
| H  | 2.48859000  | 0.87958700  | 2.45682600  |
| B  | 2.35583500  | 0.06389400  | -0.00006100 |
| H  | 3.37973900  | -0.60344400 | -0.00014700 |
| B  | 1.87059900  | 0.94459800  | -1.45189500 |
| H  | 2.48850800  | 0.87973600  | -2.45686800 |
| B  | 2.47866700  | 1.79813400  | 0.00000100  |
| H  | 3.52925800  | 2.33476800  | -0.00000700 |
| Pb | -1.46848200 | -0.29500300 | 0.00000000  |
| Ca | 2.20589200  | -2.43059300 | 0.00000500  |

## S3

|   |             |             |             |
|---|-------------|-------------|-------------|
| C | -0.28371700 | 1.62383800  | -0.82593200 |
| H | -1.00062000 | 2.17490900  | -1.42154600 |
| B | -0.45500800 | 1.58774700  | 0.87015200  |
| H | -1.34335100 | 2.17489300  | 1.39109100  |
| B | 0.35881900  | 0.08899800  | 1.45697400  |
| H | 0.16106900  | -0.47073300 | 2.48576000  |
| B | 0.91589300  | -0.75762100 | -0.05161300 |
| H | 1.11892700  | -1.96557700 | -0.12421100 |
| B | 0.41552000  | 0.23561500  | -1.46404600 |

|    |             |             |             |
|----|-------------|-------------|-------------|
| H  | 0.17812400  | -0.16010800 | -2.55544500 |
| B  | 1.29001700  | 1.78993500  | -1.38275000 |
| H  | 1.54689100  | 2.36739100  | -2.37738100 |
| B  | 0.73261800  | 2.62383000  | 0.07355400  |
| H  | 0.58661300  | 3.79264100  | 0.05865700  |
| B  | 1.18638400  | 1.66739700  | 1.49732900  |
| H  | 1.47088800  | 2.16489700  | 2.52917700  |
| B  | 2.01598500  | 0.24439000  | 0.91213800  |
| H  | 2.92356600  | -0.25427500 | 1.56433100  |
| B  | 2.06345100  | 0.31295000  | -0.87426100 |
| H  | 2.98792600  | -0.14157300 | -1.53007000 |
| B  | 2.28732600  | 1.78672500  | 0.09236600  |
| H  | 3.33147800  | 2.33823200  | 0.13682800  |
| Pb | -1.59558000 | -0.43471200 | -0.00671500 |
| Ca | 3.32616800  | -1.70085700 | -0.01501000 |

#### S4

|    |             |             |             |
|----|-------------|-------------|-------------|
| C  | -0.06952000 | 1.52509200  | -0.75055600 |
| H  | -0.63533400 | 2.26640500  | -1.30049400 |
| B  | -0.22010500 | 1.44198900  | 0.93603500  |
| H  | -0.92606000 | 2.20127300  | 1.51005500  |
| B  | 0.20109400  | -0.24304200 | 1.42982900  |
| H  | -0.10541000 | -0.76930700 | 2.44884100  |
| B  | 0.50311500  | -1.16511800 | -0.13070500 |
| H  | 0.42792500  | -2.34563300 | -0.25042500 |
| B  | 0.24205700  | 0.02867300  | -1.47021800 |
| H  | -0.09690300 | -0.20982000 | -2.58023700 |
| B  | 1.47053100  | 1.30926200  | -1.35706800 |
| H  | 1.87679400  | 1.86473600  | -2.31520000 |
| B  | 1.17363600  | 2.19245300  | 0.16327500  |
| H  | 1.37237300  | 3.35347200  | 0.20184800  |
| B  | 1.39073900  | 1.07179600  | 1.53085200  |
| H  | 1.83272700  | 1.44005400  | 2.56331400  |
| B  | 1.80739800  | -0.51213800 | 0.84866700  |
| H  | 2.56835000  | -1.26338800 | 1.44426500  |
| B  | 1.84613700  | -0.36278300 | -0.93607000 |
| H  | 2.62914600  | -0.99221600 | -1.63060100 |
| B  | 2.42630500  | 0.97535700  | 0.09204100  |
| H  | 3.60599100  | 1.27829400  | 0.12889800  |
| Pb | -1.82143400 | -0.26761500 | -0.01016200 |
| Ca | 4.15102700  | -0.88561100 | -0.02084100 |

#### S5

|   |             |             |             |
|---|-------------|-------------|-------------|
| C | -0.63267100 | -1.11281600 | 0.00152200  |
| H | -0.59305400 | -2.19527800 | 0.00245200  |
| B | -0.26276700 | -0.25499100 | 1.42094100  |
| H | 0.00471800  | -0.86537200 | 2.40242500  |
| B | 0.25045900  | 1.40223900  | 0.91387600  |
| H | 0.92208300  | 2.11496400  | 1.58555800  |
| B | 0.24995200  | 1.40053600  | -0.91634700 |

|    |             |             |             |
|----|-------------|-------------|-------------|
| H  | 0.92144900  | 2.11188700  | -1.58962300 |
| B  | -0.26333600 | -0.25756800 | -1.41996600 |
| H  | 0.00300900  | -0.87006300 | -2.40043700 |
| B  | -1.89788500 | -0.47853900 | -0.89063500 |
| H  | -2.67374300 | -1.21829900 | -1.47414200 |
| B  | -1.89787800 | -0.47686600 | 0.89327100  |
| H  | -2.67422300 | -1.21517100 | 1.47784800  |
| B  | -1.39463900 | 1.11381300  | 1.45725100  |
| H  | -1.84628700 | 1.54846900  | 2.46028100  |
| B  | -1.07120100 | 2.11687100  | -0.00158700 |
| H  | -1.30453800 | 3.27518600  | -0.00251200 |
| B  | -1.39555000 | 1.11105600  | -1.45827800 |
| H  | -1.84779100 | 1.54348800  | -2.46201100 |
| B  | -2.39457400 | 0.98062000  | 0.00002900  |
| H  | -3.55399000 | 1.36222000  | 0.00032700  |
| Pb | 1.86128900  | -0.22578800 | -0.00000100 |
| Ca | -4.29000800 | -0.68432000 | -0.00010000 |

$CH_3XB_{11}H_{11}^-$

C

|    |             |             |             |
|----|-------------|-------------|-------------|
| C  | 1.84259500  | -0.45578900 | -0.00095500 |
| B  | -1.00362900 | 1.01657600  | 0.00141200  |
| B  | 0.00372600  | 1.01747100  | -1.45052000 |
| B  | 0.00380400  | 1.01174900  | 1.45381500  |
| B  | -0.72594400 | -0.49681300 | -0.89083600 |
| B  | 0.92878500  | -0.49882600 | -1.43802900 |
| B  | -0.72683500 | -0.50021300 | 0.88751300  |
| B  | 0.92605800  | -0.50486800 | 1.43584900  |
| B  | 1.67131100  | 0.99854900  | -0.88298600 |
| B  | 0.47385800  | 1.94716900  | 0.00385800  |
| B  | 0.46870200  | -1.44124200 | -0.00236300 |
| H  | -0.34336800 | 1.52713000  | -2.45713000 |
| H  | -0.34252300 | 1.51802000  | 2.46239200  |
| H  | -1.60521000 | -1.05674200 | -1.52058300 |
| H  | 1.33227200  | -1.07654000 | -2.38177700 |
| H  | -1.60573100 | -1.06317700 | 1.51507300  |
| H  | 1.32971600  | -1.08453400 | 2.37818300  |
| H  | 2.60531400  | 1.42104700  | -1.46241300 |
| H  | 0.46343000  | 3.12611700  | 0.00690100  |
| H  | 0.55238300  | -2.61718900 | -0.00607700 |
| H  | -2.09588300 | 1.56053300  | 0.00185200  |
| B  | 1.67349100  | 0.99289400  | 0.88575800  |
| H  | 2.60766400  | 1.41206000  | 1.46785000  |
| C  | 3.20248500  | -1.13542400 | -0.00108600 |
| H  | 3.23428400  | -1.92226300 | -0.75220300 |
| H  | 3.98145100  | -0.40943600 | -0.22424300 |
| H  | 3.40564200  | -1.57400700 | 0.97384500  |
| Ca | -3.11282800 | -0.39629900 | -0.00033900 |



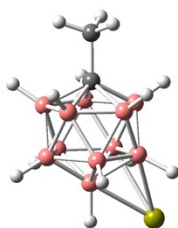

## Si

|    |             |             |             |
|----|-------------|-------------|-------------|
| B  | 1.32314000  | 0.98263000  | 0.00020700  |
| B  | 0.32765600  | 1.07264200  | 1.45664100  |
| B  | 0.32732800  | 1.07471900  | -1.45577100 |
| B  | 0.91984100  | -0.50184800 | 0.89165600  |
| B  | -0.70026800 | -0.37504900 | 1.50256600  |
| B  | 0.91960000  | -0.50055600 | -0.89307900 |
| B  | -0.70098000 | -0.37285700 | -1.50341400 |
| B  | -1.33877400 | 1.25788400  | 0.92754100  |
| B  | -0.05980100 | 2.04634700  | 0.00117500  |
| B  | -0.30499700 | -1.39435700 | -0.00092800 |
| H  | 0.74436100  | 1.55353300  | 2.45212200  |
| H  | 0.74435000  | 1.55663200  | -2.45062700 |
| H  | 1.76795900  | -1.11714800 | 1.51804800  |
| H  | -1.01321700 | -0.88672900 | 2.52159300  |
| H  | 1.76791800  | -1.11475500 | -1.52025000 |
| H  | -1.01309900 | -0.88353600 | -2.52318300 |
| H  | -2.12725400 | 1.87004500  | 1.56104700  |
| H  | 0.08173000  | 3.21780000  | 0.00229300  |
| H  | -0.32831300 | -2.57768700 | -0.00221200 |
| H  | 2.45625100  | 1.43296700  | 0.00014700  |
| B  | -1.33848600 | 1.25944200  | -0.92613300 |
| H  | -2.12867700 | 1.87131000  | -1.55783400 |
| Si | -2.06742000 | -0.38759400 | -0.00029800 |
| C  | -3.76994400 | -1.08593300 | 0.00003000  |
| H  | -4.47878100 | -0.31031900 | -0.28774100 |
| H  | -3.83360800 | -1.91041300 | -0.70867200 |
| H  | -4.01958700 | -1.44685500 | 0.99691800  |
| Ca | 3.30361100  | -0.60289500 | 0.00000200  |

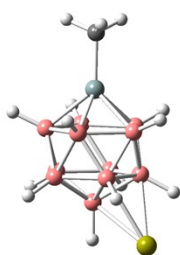

## Ge

|    |             |             |             |
|----|-------------|-------------|-------------|
| B  | 0.38122900  | -0.29238900 | 1.52241800  |
| B  | 0.95542200  | 1.38617600  | 0.93854200  |
| B  | 0.95494000  | 1.38619300  | -0.93883900 |
| B  | 0.38142800  | -0.29240600 | -1.52244800 |
| B  | 0.02536800  | -1.34249300 | 0.00035200  |
| B  | -0.69991700 | 1.11145400  | 1.45631700  |
| B  | -0.35505600 | 2.09993000  | -0.00013800 |
| B  | -0.70010500 | 1.11137400  | -1.45643400 |
| B  | -1.22307200 | -0.48774500 | -0.89237000 |
| B  | -1.22321300 | -0.48772300 | 0.89267300  |
| B  | -1.68965300 | 0.97819400  | 0.00002400  |
| C  | 3.65375600  | -0.93663400 | 0.00011000  |
| H  | -2.84117900 | 1.37987200  | 0.00001700  |
| H  | -1.14426000 | 1.57544800  | -2.44832200 |
| H  | -2.04748100 | -1.13481600 | -1.51904200 |
| H  | -2.04775100 | -1.13462500 | 1.51933500  |
| H  | -1.14360900 | 1.57602800  | 2.44817400  |
| H  | -0.55409200 | 3.26324500  | 0.00011700  |
| H  | 0.69038500  | -0.78596900 | -2.55089600 |
| H  | 0.07513500  | -2.52464400 | -0.00004200 |
| H  | 0.69170800  | -0.78540700 | 2.55071500  |
| H  | 1.69619500  | 2.04846800  | 1.57770500  |
| H  | 1.69746100  | 2.04727300  | -1.57736800 |
| H  | 4.30092100  | -0.19340100 | -0.45994400 |
| H  | 3.96855100  | -1.11354300 | 1.02589500  |
| H  | 3.69823100  | -1.86426400 | -0.56546300 |
| Ge | 1.84355400  | -0.27420600 | -0.00007300 |
| Ca | -3.59966700 | -0.69060400 | 0.00001600  |

## Sn

|    |             |             |             |
|----|-------------|-------------|-------------|
| Sn | 1.75952900  | -0.19246100 | 0.00007300  |
| B  | 0.54945700  | 1.49565400  | -0.94901000 |
| B  | 0.05115900  | -0.22530300 | -1.53508700 |
| B  | -0.25693200 | -1.29797100 | 0.00002600  |

|    |             |             |             |
|----|-------------|-------------|-------------|
| B  | 0.05101200  | -0.22521900 | 1.53506500  |
| B  | 0.54945700  | 1.49572900  | 0.94897300  |
| B  | -1.08676400 | 1.12850100  | -1.45742100 |
| B  | -1.53383100 | -0.49345100 | -0.89355200 |
| B  | -1.53388000 | -0.49343100 | 0.89343500  |
| B  | -1.08688700 | 1.12855700  | 1.45724000  |
| B  | -0.78783400 | 2.13318100  | -0.00011900 |
| B  | -2.06795200 | 0.94959800  | -0.00013300 |
| C  | 3.75577200  | -0.86973600 | -0.00010500 |
| H  | -3.23647500 | 1.29829400  | -0.00022100 |
| H  | -2.33295700 | -1.17201700 | 1.52157300  |
| H  | -1.55790700 | 1.57358400  | 2.44610900  |
| H  | -1.04676300 | 3.28518300  | -0.00008200 |
| H  | -1.55778700 | 1.57339000  | -2.44635000 |
| H  | -2.33292700 | -1.17203600 | -1.52166600 |
| H  | 0.33961600  | -0.69707900 | 2.58124800  |
| H  | 1.21977100  | 2.22003600  | 1.60105700  |
| H  | 1.22040300  | 2.21959600  | -1.60091700 |
| H  | 0.33945800  | -0.69728400 | -2.58128100 |
| H  | -0.19547100 | -2.48144800 | -0.00002900 |
| H  | 3.76493400  | -1.93023700 | -0.23638400 |
| H  | 4.31054300  | -0.31200500 | -0.74972600 |
| H  | 4.18014400  | -0.69909600 | 0.98555000  |
| Ca | -3.89303500 | -0.80733200 | 0.00005100  |

## Pb

|   |             |             |             |
|---|-------------|-------------|-------------|
| B | -0.31282800 | -0.21122100 | -1.53472600 |
| B | -0.58837200 | -1.27151700 | -0.00017700 |
| B | -0.31314900 | -0.21108600 | 1.53472300  |
| B | 0.14960100  | 1.54110800  | 0.97075600  |
| B | 0.14997400  | 1.54149100  | -0.97051500 |
| B | -1.89007000 | -0.50910400 | -0.89184100 |
| B | -1.89005600 | -0.50891100 | 0.89127000  |
| B | -1.47618800 | 1.11493000  | 1.45960500  |
| B | -1.19007800 | 2.13023400  | 0.00001500  |
| B | -1.47555000 | 1.11504200  | -1.45977700 |
| B | -2.45093000 | 0.92630500  | -0.00046100 |
| C | 3.42630700  | -1.06276600 | -0.00037200 |
| H | -3.62365300 | 1.26005800  | -0.00073100 |
| H | -1.95408200 | 1.56236500  | 2.44439300  |
| H | -1.46944100 | 3.27778800  | -0.00034600 |
| H | -1.95333900 | 1.56253700  | -2.44460500 |
| H | -2.67732400 | -1.19903300 | -1.52374800 |
| H | -2.67735700 | -1.19905900 | 1.52299400  |
| H | 0.79084300  | 2.29053400  | 1.62087300  |
| H | 0.79142700  | 2.29068100  | -1.62065400 |
| H | -0.01372800 | -0.67645100 | -2.58065600 |
| H | -0.49054100 | -2.45288600 | -0.00010500 |
| H | -0.01465800 | -0.67672500 | 2.58063300  |

|    |             |             |             |
|----|-------------|-------------|-------------|
| H  | 3.43795600  | -1.73517800 | 0.85088600  |
| H  | 3.50719200  | -1.59988100 | -0.93941800 |
| H  | 4.18250100  | -0.29052200 | 0.08716500  |
| Pb | 1.49772700  | -0.08521800 | 0.00011700  |
| Ca | -4.23845100 | -0.86680700 | 0.00007800  |
